# Supplementary material for: Retracted Article: One-pot synthesis of O-doped BN nanosheets as a capacitive deionization electrode for efficient removal of heavy metal ions from water
Source: Royal Society of Chemistry journal article supplement (doi:10.1039/c7ta05459a), 2017-01-01
Supplement: c7ta05459a1.pdf [file c7ta05459a1.pdf]

### Supporting Information

One-pot synthesis of O-doped BN nanosheets as capacitive deionization electrode for efficient removal of heavy metal ions from water

Ming Ming Chen,<sup>a,b</sup> Da Wei,<sup>a,b</sup> Wei Chu,<sup>c</sup> Tao Wang<sup>a,b</sup> and Dong Ge Tong<sup>a,b\*</sup>

<sup>a</sup> State Key Laboratory of Geohazard Prevention and Geoenvironment Protection, Chengdu University of Technology, Chengdu 610059, China. E-mail: tongdongge@163.com; Fax: +86 28 8407 3193

<sup>b</sup> Collaborative Innovation Center of Panxi Strategic Mineral Resources Multi-purpose Utilization, College of Materials and Chemistry & Chemical Engineering, Chengdu University of Technology, Chengdu 610059, China.

<sup>c</sup> School of Chemical Engineering & Institute of New Energy and Low Carbon Technology, Sichuan University, Chengdu 610065, China. E-mail: chuwei1965@foxmail.com; Fax: +86 28 8540 3397

Summary: 41 Pages; 10 Tables; 32 Figures

## Table of Contents

|                 |    |
|-----------------|----|
| Table S1 .....  | 3  |
| Table S2 .....  | 4  |
| Table S3 .....  | 4  |
| Table S4 .....  | 5  |
| Table S5 .....  | 5  |
| Table S6 .....  | 6  |
| Table S7 .....  | 6  |
| Table S8 .....  | 7  |
| Table S9 .....  | 8  |
| Table S10 ..... | 9  |
| Fig.S1 .....    | 10 |
| Fig.S2 .....    | 12 |
| Fig.S3 .....    | 13 |
| Fig.S4 .....    | 14 |
| Fig.S5 .....    | 15 |
| Fig.S6 .....    | 15 |
| Fig.S7 .....    | 16 |
| Fig.S8 .....    | 16 |
| Fig.S9 .....    | 17 |
| Fig.S10 .....   | 18 |
| Fig.S11 .....   | 19 |
| Fig.S12 .....   | 20 |
| Fig.S13 .....   | 21 |
| Fig.S14 .....   | 22 |
| Fig.S15 .....   | 23 |
| Fig.S16 .....   | 24 |
| Fig.S17 .....   | 25 |
| Fig.S18.....    | 26 |
| Fig.S19.....    | 27 |
| Fig.S20.....    | 28 |
| Fig.S21.....    | 29 |
| Fig.S22.....    | 30 |
| Fig.S23.....    | 31 |
| Fig.S24.....    | 32 |
| Fig.S25.....    | 33 |
| Fig.S26.....    | 34 |
| Fig.S27.....    | 35 |
| Fig.S28.....    | 36 |
| Fig.S29.....    | 37 |
| Fig.S30.....    | 38 |
| Fig.S31.....    | 40 |
| Fig.S32.....    | 41 |

**Table S1** The effect of reaction parameters, including reaction temperature, reaction time, NOCl/CuB<sub>23</sub> nanosheets, ionic liquid volume and ionic liquid kinds on the yields, average thickness, and chemical composition of BNO nanosheets

| Sample | Reaction temperature/ °C | Reaction time /min | Reaction NOCl/CuB <sub>23</sub> nanosheets | Ionic liquid volume/ml | Ionic liquid kinds       | Yields /% | Nanosheets yields /% | Average thickness /nm | Chemical composition |
|--------|--------------------------|--------------------|--------------------------------------------|------------------------|--------------------------|-----------|----------------------|-----------------------|----------------------|
| 1      | 25                       | 30                 | 25:1                                       | 50                     | [BMIM]Cl                 | 100.0     | 100.0                | 1.033                 | BNO                  |
| 2      | 35                       | 24                 | 25:1                                       | 50                     | [BMIM]Cl                 | 100.0     | 100.0                | 1.033                 | BNO                  |
| 3      | 45                       | 19                 | 25:1                                       | 50                     | [BMIM]Cl                 | 100.0     | 100.0                | 1.033                 | BNO                  |
| 4      | 55                       | 14                 | 25:1                                       | 50                     | [BMIM]Cl                 | 100.0     | 100.0                | 1.033                 | BNO                  |
| 5      | 65                       | 10                 | 25:1                                       | 50                     | [BMIM]Cl                 | 100.0     | 100.0                | 1.033                 | BNO                  |
| 6      | 25                       | 30                 | 25:1                                       | 50                     | [BMIM]Cl                 | 100.0     | 100.0                | 1.033                 | BNO                  |
| 7      | 25                       | 60                 | 25:1                                       | 50                     | [BMIM]Cl                 | 100.0     | 100.0                | 1.033                 | BNO                  |
| 8      | 25                       | 20                 | 25:1                                       | 50                     | [BMIM]Cl                 | 70.0      | 100.0                | 1.033                 | BNO                  |
| 9      | 25                       | 10                 | 25:1                                       | 50                     | [BMIM]Cl                 | 55.0      | 100.0                | 1.033                 | BNO                  |
| 10     | 25                       | 5                  | 25:1                                       | 50                     | [BMIM]Cl                 | 38.0      | 100.0                | 1.033                 | BNO                  |
| 11     | 25                       | 2                  | 25:1                                       | 50                     | [BMIM]Cl                 | 23.0      | 100.0                | 1.033                 | BNO                  |
| 12     | 25                       | 1                  | 25:1                                       | 50                     | [BMIM]Cl                 | 12.0      | 100.0                | 1.033                 | BNO                  |
| 13     | 25                       | 0.5                | 25:1                                       | 50                     | [BMIM]Cl                 | 5.0       | 100.0                | 1.033                 | BNO                  |
| 14     | 25                       | 30                 | 24:1                                       | 50                     | [BMIM]Cl                 | 97.0      | 100.0                | 1.033                 | BNO                  |
| 15     | 25                       | 30                 | 23:1                                       | 50                     | [BMIM]Cl                 | 90.0      | 100.0                | 1.033                 | BNO                  |
| 16     | 25                       | 30                 | 25:1                                       | 50                     | [BMIM][BF <sub>4</sub> ] | 100.0     | 100.0                | 1.033                 | BNO                  |
| 17     | 25                       | 30                 | 25:1                                       | 50                     | [BMIM][PF <sub>6</sub> ] | 100.0     | 100.0                | 1.033                 | BNO                  |
| 18     | 25                       | 30                 | 25:1                                       | 70                     | [BMIM]Cl                 | 100.0     | 100.0                | 1.033                 | BNO                  |
| 19     | 25                       | 30                 | 25:1                                       | 30                     | [BMIM]Cl                 | 90.0      | 100.0                | 1.033                 | BNO                  |

**Table S2** Evaluated model parameters of the adsorption isotherms of BNO nanosheets over  $\text{Cd}^{2+}$  at 298 K

| <b>Langmuir model</b>                      | <b>Freundlich model</b>                                          |
|--------------------------------------------|------------------------------------------------------------------|
| $q_m = 2281 \text{ mgg}^{-1}$              | $1/n = 0.5101$                                                   |
| $K_L = 0.003581 \text{ (Lmg}^{-1}\text{)}$ | $K_F = 58.3115 \text{ (mgg}^{-1}\text{)(Lmg}^{-1}\text{)}^{1/n}$ |
| $R^2 = 0.9990$                             | $R^2 = 0.9643$                                                   |

**Table S3**  $\text{Cd}^{2+}$  electrosorption dimensionless quantity ( $R_L$ ) over BNO nanosheets at different initial concentrations

| <b>Initial concentrations / <math>\text{mgL}^{-1}</math></b> | <b><math>R_L</math></b> |
|--------------------------------------------------------------|-------------------------|
| 100                                                          | 0.74                    |
| 200                                                          | 0.58                    |
| 300                                                          | 0.48                    |
| 400                                                          | 0.41                    |
| 600                                                          | 0.32                    |
| 800                                                          | 0.26                    |
| 1000                                                         | 0.22                    |
| 1200                                                         | 0.19                    |



**Table S4** Parameters of pseudo-first-order and pseudo-second-order models for the electro-adsorption of  $\text{Cd}^{2+}$  onto BNO nanosheets at 298 K under 1.2V

| <b>Pseudo-first-order model</b>             | <b>Pseudo-second-order model</b>            |
|---------------------------------------------|---------------------------------------------|
| $C_0 = 600 \text{ mgL}^{-1}$                | $C_0 = 600 \text{ mgL}^{-1}$                |
| $q_{e, \text{exp}} = 1395 \text{ mgg}^{-1}$ | $q_{e, \text{exp}} = 1395 \text{ mgg}^{-1}$ |
| $q_{e, \text{cal}} = 18 \text{ mgg}^{-1}$   | $q_{e, \text{cal}} = 1395 \text{ mgg}^{-1}$ |
| $K_1 = 0.1494$                              | $K_2 = 8.06 \times 10^{-4}$                 |
| $R^2 = 0.9253$                              | $R^2 = 1$                                   |

**Table S5** Parameters of pseudo-first-order and pseudo-second-order kinetics in terms of different voltages for the electro-sorption of  $\text{Cd}^{2+}$  onto BNO nanosheets at 298 K

| <b>Bias potential</b> | <b>Pseudo-first-order</b>             |                         |        | <b>Pseudo-second-order</b>            |                                          |        |
|-----------------------|---------------------------------------|-------------------------|--------|---------------------------------------|------------------------------------------|--------|
|                       | $q_{e, \text{cal}} / \text{mgg}^{-1}$ | $K_1 / \text{min}^{-1}$ | $R^2$  | $q_{e, \text{cal}} / \text{mgg}^{-1}$ | $K_2 / \text{gmg}^{-1} \text{ min}^{-1}$ | $R^2$  |
| 0                     | 8.55                                  | 0.0758                  | 0.9388 | 243                                   | $2.47 \times 10^{-3}$                    | 0.9999 |
| 0.4                   | 13.31                                 | 0.1035                  | 0.8663 | 625                                   | $1.35 \times 10^{-3}$                    | 0.9999 |
| 0.8                   | 15.92                                 | 0.1200                  | 0.9249 | 1000                                  | $1.00 \times 10^{-3}$                    | 0.9999 |

**Table S6** Thermodynamic parameters for the electrosorption of Cd<sup>2+</sup> onto BNO nanosheets at 298 K

| Temperature / K | $\Delta G/(\text{kJ mol}^{-1})$ | $\Delta H/(\text{kJ mol}^{-1})$ | $\Delta S/(\text{J mol}^{-1})$ |
|-----------------|---------------------------------|---------------------------------|--------------------------------|
| 298 K           | -2.746                          |                                 |                                |
| 308 K           | -2.222                          | -12.782                         | -33.9                          |
| 318 K           | -1.959                          |                                 |                                |
| 328 K           | -1.702                          |                                 |                                |

**Table S7** Evaluated model parameters of the electrosorption isotherms of BNO nanosheets over various cations at 298 K

| Cations          | Langmuir model          |                       |        | Freundlich model |                                                    |        |
|------------------|-------------------------|-----------------------|--------|------------------|----------------------------------------------------|--------|
|                  | $q_m/\text{m g g}^{-1}$ | $K_L/\text{L g}^{-1}$ | $R^2$  | 1/n              | $K_F/(\text{m g g}^{-1})(\text{L m g}^{-1})^{1/n}$ | $R^2$  |
| Pb <sup>2+</sup> | 735                     | 0.00238               | 1      | 0.6399           | 6.85                                               | 0.9286 |
| Cu <sup>2+</sup> | 858                     | 0.00244               | 0.9996 | 0.6363           | 8.29                                               | 0.9274 |
| Ni <sup>2+</sup> | 976                     | 0.00250               | 0.9995 | 0.6331           | 9.62                                               | 0.9263 |
| Co <sup>2+</sup> | 865                     | 0.00251               | 0.9995 | 0.6328           | 9.77                                               | 0.9262 |
| Zn <sup>2+</sup> | 3211                    | 0.00515               | 0.9976 | 0.5331           | 81.22                                              | 0.8875 |
| Mg <sup>2+</sup> | 829                     | 0.00245               | 0.9996 | 0.6361           | 8.38                                               | 0.9273 |
| Ca <sup>2+</sup> | 963                     | 0.00243               | 0.9996 | 0.6372           | 7.95                                               | 0.9277 |
| Fe <sup>2+</sup> | 971                     | 0.00251               | 0.9995 | 0.6329           | 9.71                                               | 0.9262 |
| Fe <sup>3+</sup> | 1200                    | 0.00287               | 0.9998 | 0.5923           | 13.21                                              | 0.9154 |
| Na <sup>+</sup>  | 578                     | 0.00203               | 1      | 0.6405           | 5.56                                               | 0.9213 |

**Table S8** Parameters of pseudo-first-order and pseudo-second-order models for the electrosorption over various cations at 298 K

| Cations          | $C_0/\text{mgL}^{-1}$ | $q_{e,\text{exp}}$<br><br>$/\text{mgg}^{-1}$ | Pseudo-first-order                       |                       |        | Pseudo-second-order                      |                                      |       |
|------------------|-----------------------|----------------------------------------------|------------------------------------------|-----------------------|--------|------------------------------------------|--------------------------------------|-------|
|                  |                       |                                              | model                                    |                       |        | model                                    |                                      |       |
|                  |                       |                                              | $q_{e,\text{cal}}$<br>$/\text{mgg}^{-1}$ | $k_1/\text{min}^{-1}$ | $R^2$  | $q_{e,\text{cal}}$<br>$/\text{mgg}^{-1}$ | $k_2/\text{gmg}^{-1}\text{min}^{-1}$ | $R^2$ |
| $\text{Pb}^{2+}$ | 600                   | 220                                          | 10.9                                     | 0.0750                | 0.9325 | 426                                      | 0.00148                              | 1     |
| $\text{Cu}^{2+}$ | 600                   | 488                                          | 11.3                                     | 0.0878                | 0.9521 | 514                                      | 0.00140                              | 1     |
| $\text{Ni}^{2+}$ | 600                   | 559                                          | 12.3                                     | 0.0976                | 0.9307 | 580                                      | 0.00135                              | 1     |
| $\text{Co}^{2+}$ | 600                   | 410                                          | 12.3                                     | 0.109                 | 0.9558 | 588                                      | 0.00152                              | 1     |
| $\text{Zn}^{2+}$ | 600                   | 2080                                         | 21.9                                     | 0.225                 | 0.9179 | 2192                                     | 0.000693                             | 1     |
| $\text{Mg}^{2+}$ | 600                   | 245                                          | 11.7                                     | 0.107                 | 0.9299 | 518                                      | 0.00169                              | 1     |
| $\text{Ca}^{2+}$ | 600                   | 552                                          | 11.2                                     | 0.0805                | 0.9600 | 496                                      | 0.00135                              | 1     |
| $\text{Fe}^{2+}$ | 600                   | 555                                          | 12.3                                     | 0.102                 | 0.9303 | 585                                      | 0.00139                              | 1     |
| $\text{Fe}^{3+}$ | 600                   | 682                                          | 13.6                                     | 0.115                 | 0.9305 | 680                                      | 0.001125                             | 1     |
| $\text{Na}^+$    | 600                   | 380                                          | 10.0                                     | 0.0698                | 0.9211 | 380                                      | 0.00155                              | 1     |

**Table S9** Comparison of the parameters of metal ions

| Ions             | Charge size | Hydrated radius (Å) | Ionic radius (Å) | electronegativity | Atomic weight |
|------------------|-------------|---------------------|------------------|-------------------|---------------|
| Zn <sup>2+</sup> | 2           | 4.19                | 0.72             | 1.9               | 63.55         |
| Cd <sup>2+</sup> | 2           | 4.26                | 0.97             | 1.69              | 112.4         |
| Pb <sup>2+</sup> | 2           | 4.01                | 1.32             | 2.33              | 207.2         |
| Ni <sup>2+</sup> | 2           | 4.04                | 0.70             | 1.91              | 58.69         |
| Co <sup>2+</sup> | 2           | 4.23                | 0.72             | 1.88              | 58.93         |
| Cu <sup>2+</sup> | 2           | 4.30                | 0.74             | 1.65              | 65.39         |
| Mg <sup>2+</sup> | 2           | 4.28                | 0.65             | 1.31              | 24.31         |
| Ca <sup>2+</sup> | 2           | 4.12                | 0.99             | 1.00              | 40.08         |
| Fe <sup>2+</sup> | 2           | 4.28                | 0.75             | 1.83              | 55.85         |
| Fe <sup>3+</sup> | 3           | 4.57                | 0.60             | 1.83              | 55.85         |
| Na <sup>+</sup>  | 1           | 3.58                | 0.98             | 0.90              | 22.99         |

**Table S10** Fitted EIS parameters of the as-prepared BNO nanosheets in different ion solutions at room temperature.

| Solutions         | $R_s / \Omega$ | $R_{ct} / \Omega$ | Warburg coefficient of metal ions / $s^{1/2}cm^{-1}$ |
|-------------------|----------------|-------------------|------------------------------------------------------|
| ZnCl <sub>2</sub> | 1.4            | 0.8               | $4.08 \times 10^7$                                   |
| CdCl <sub>2</sub> | 2.1            | 1.1               | $4.52 \times 10^7$                                   |
| FeCl <sub>3</sub> | 0.9            | 2.2               | $8.88 \times 10^7$                                   |
| NiCl <sub>2</sub> | 1.4            | 2.6               | $9.80 \times 10^7$                                   |
| FeCl <sub>2</sub> | 1.0            | 2.7               | $1.31 \times 10^8$                                   |
| CaCl <sub>2</sub> | 1.3            | 2.8               | $1.92 \times 10^8$                                   |
| CuCl <sub>2</sub> | 1.1            | 3.1               | $2.69 \times 10^8$                                   |
| CoCl <sub>2</sub> | 1.0            | 3.7               | $3.96 \times 10^8$                                   |
| NaCl              | 1.2            | 4.0               | $5.02 \times 10^8$                                   |
| MgCl <sub>2</sub> | 1.2            | 6.2               | $6.77 \times 10^8$                                   |
| PbCl <sub>2</sub> | 1.5            | 6.9               | $7.61 \times 10^8$                                   |

$R_s$  represents for the electrolyte resistance and  $R_{ct}$  for the charge transfer resistance.

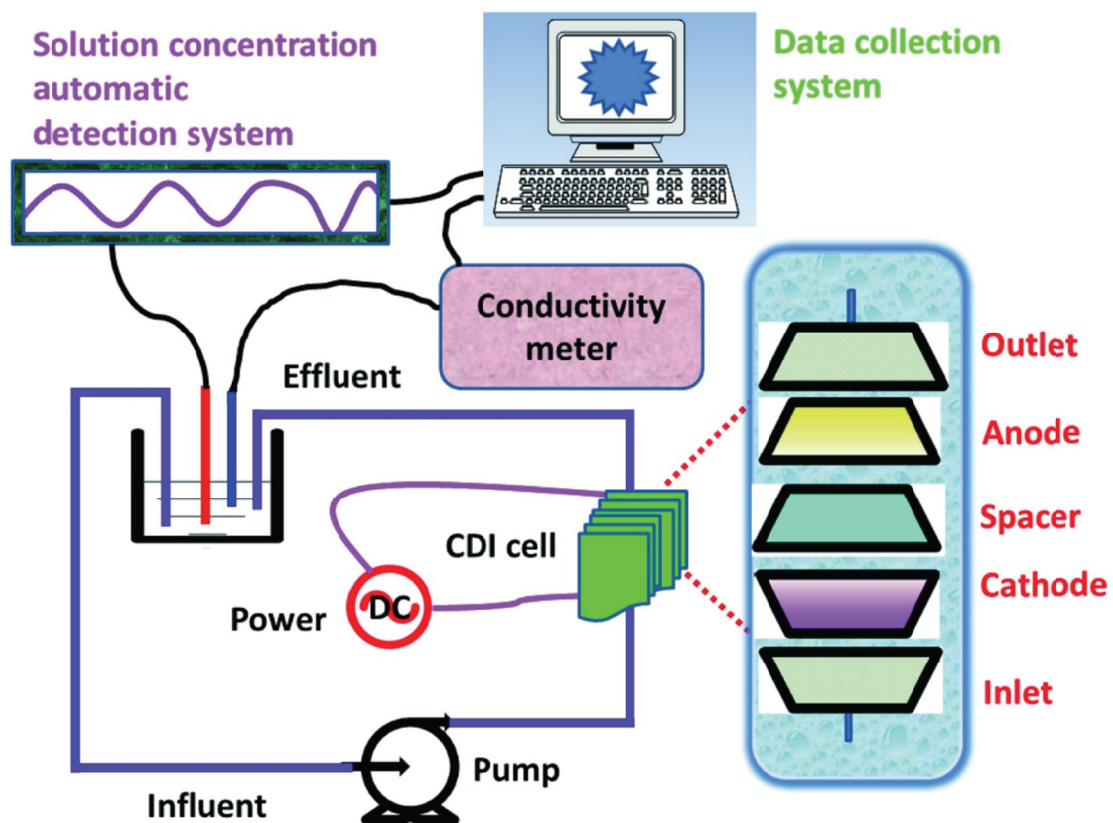

Fig.S1 Schematic diagram for the CDI cell set-up in our work.

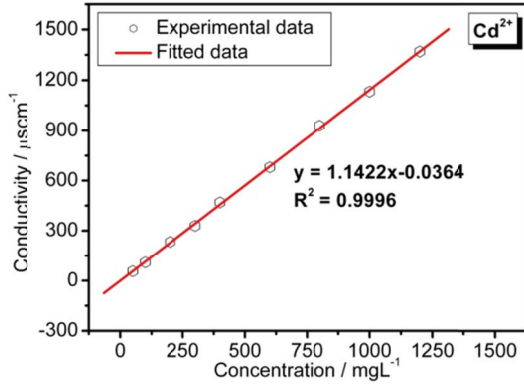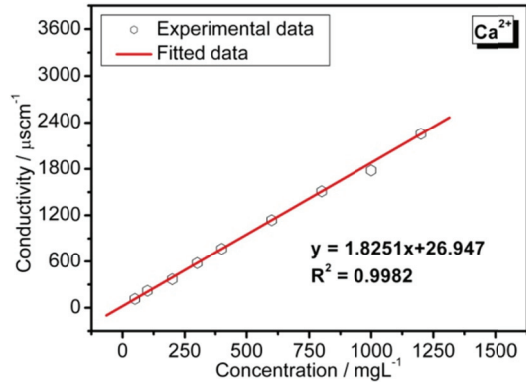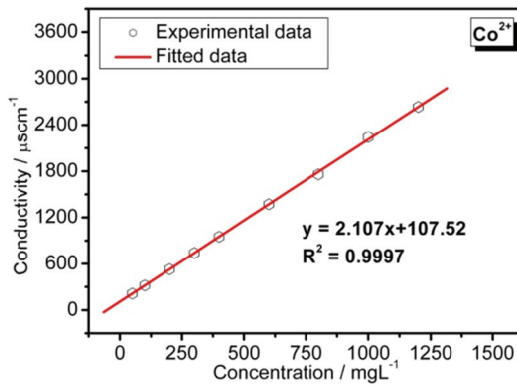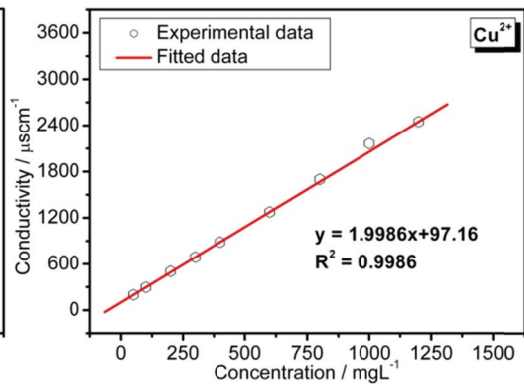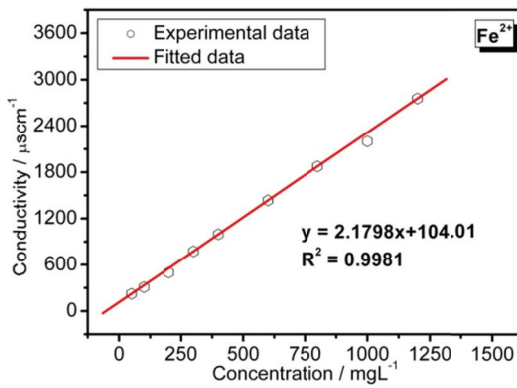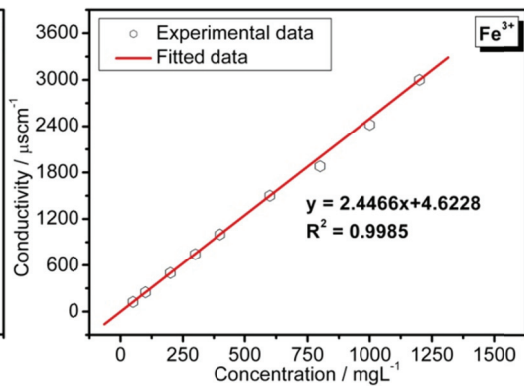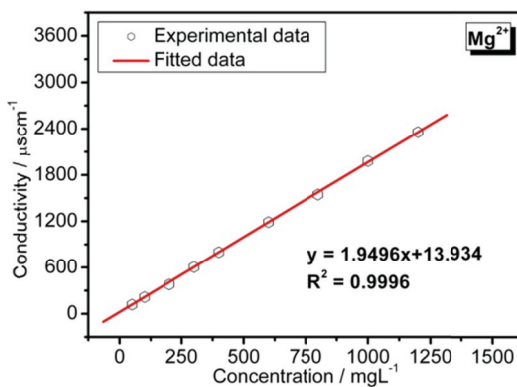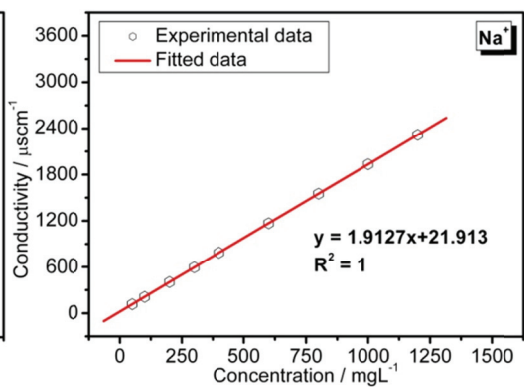

(Continued)

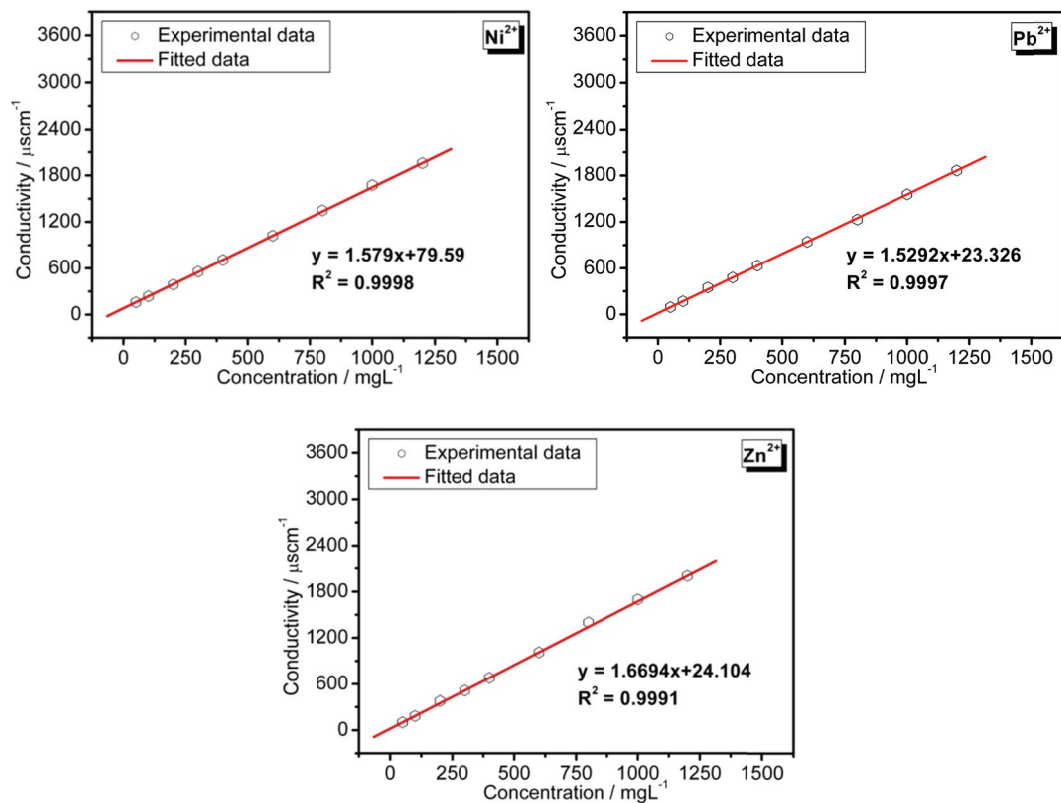

**Fig.S2** The relationship between solution concentration and conductivity of various metal chloride solution.



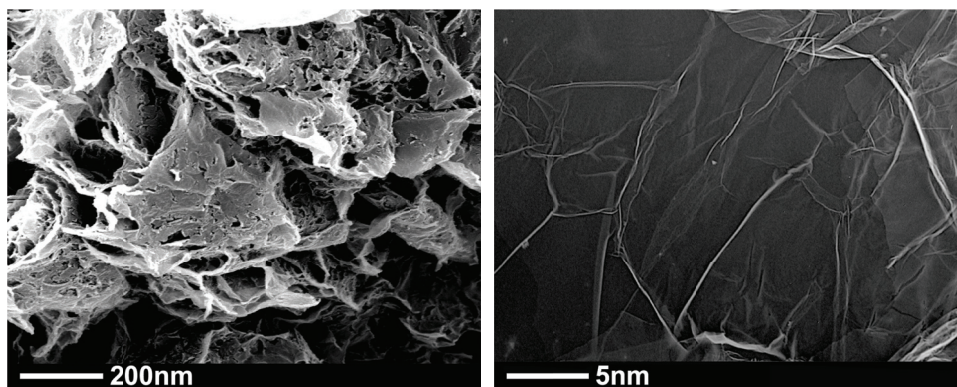

**a**

**b**

**Fig.S3** (a) Low magnification and (b) enlarged STEM images of the graphene-like  $\text{CuB}_{23}$  nanosheets.

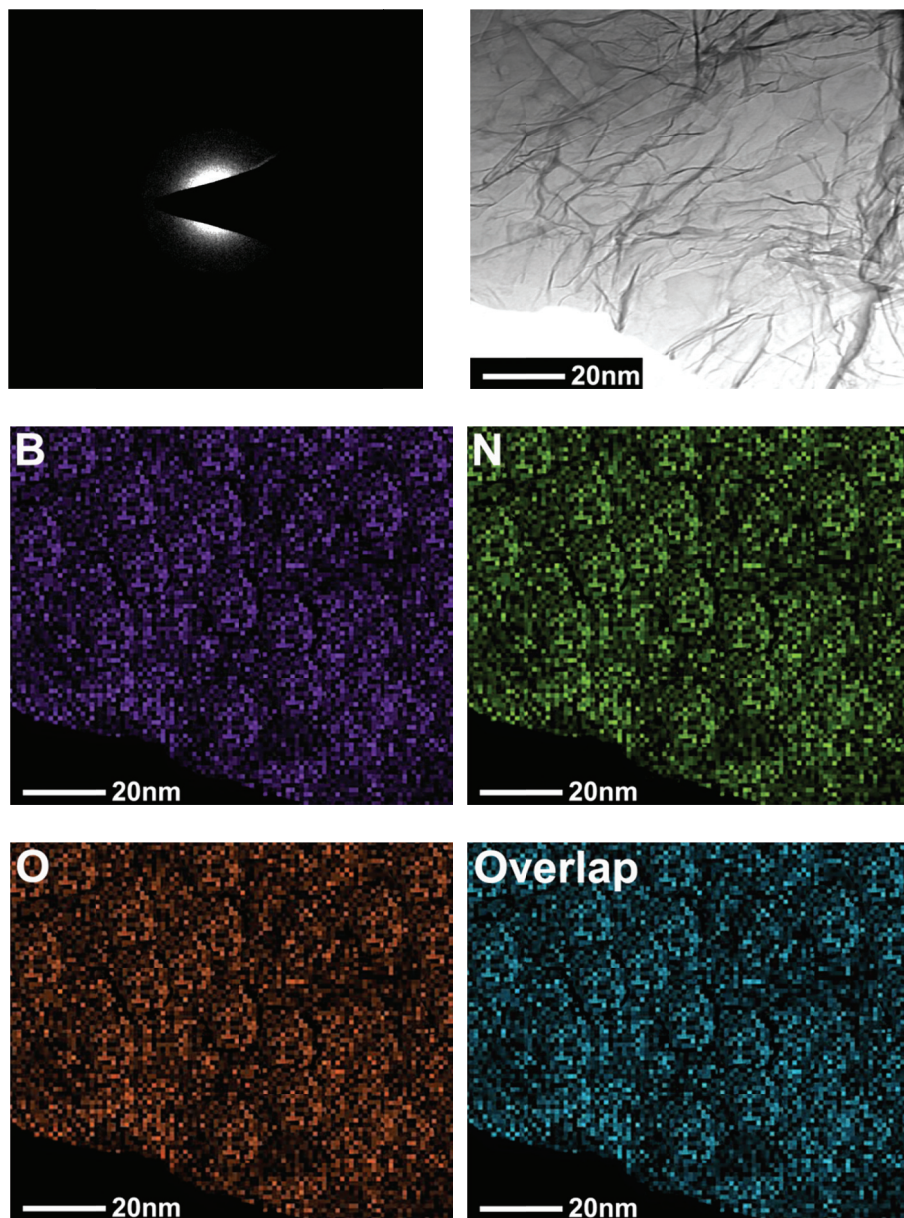

**Fig.S4** SAED pattern, B, N and O elemental maps for the as-prepared BNO nanosheets of the as-prepared BNO nanosheets.

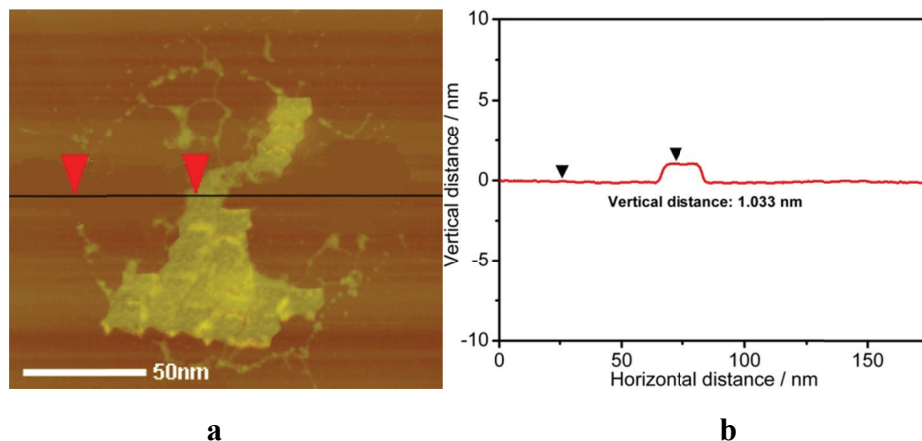

**Fig.S5** (a) AFM image and (b) the cross section analysis for the as-prepared BNO nanosheets.

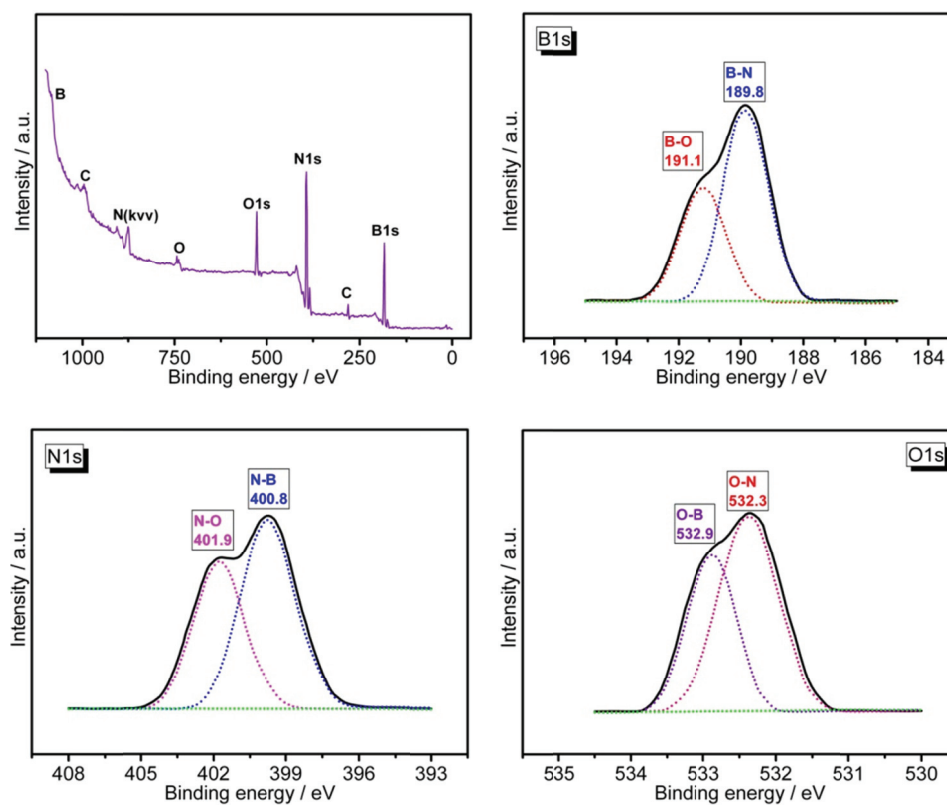

**Fig.S6** XPS survey spectrum, B 1s spectra, N 1s spectra and O 1s spectra of the as-prepared BNO nanosheets.

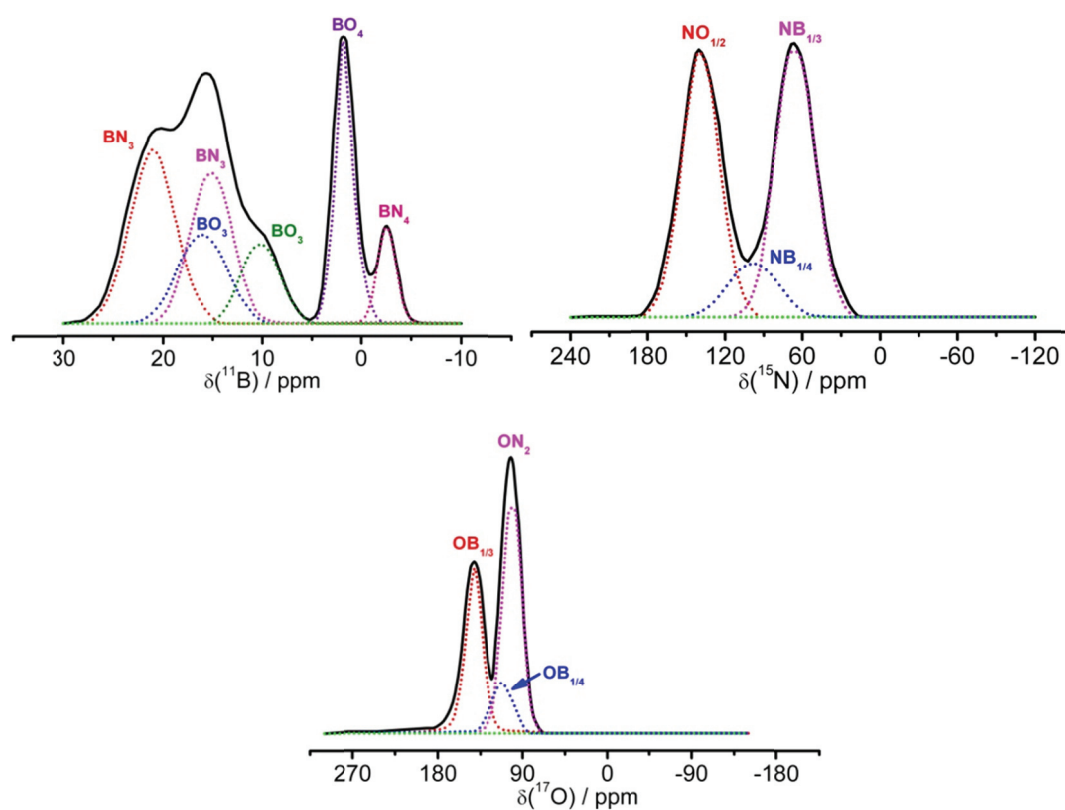

**Fig.S7**  $^{11}\text{B}$ ,  $^{15}\text{N}$  1s and  $^{17}\text{O}$  MAS NMR spectra of the as-prepared BNO nanosheets.

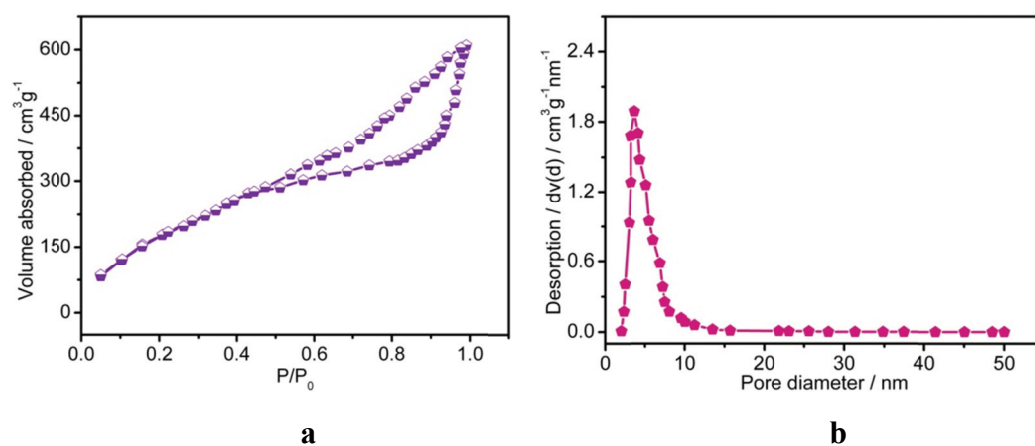

**Fig.S8** (a)  $\text{N}_2$  adsorption–desorption plots and (b) pore size distribution of the as-prepared BNO nanosheets.

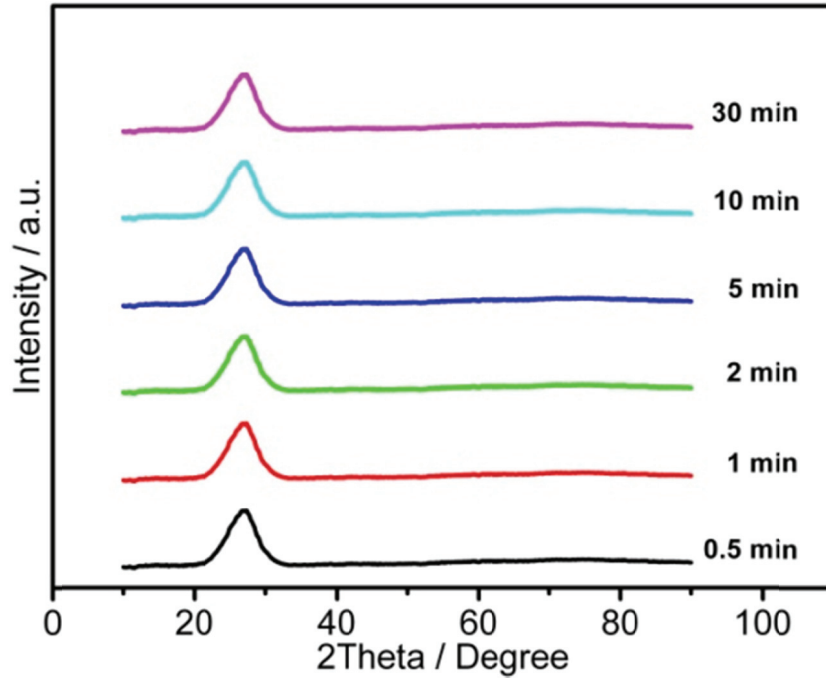

a

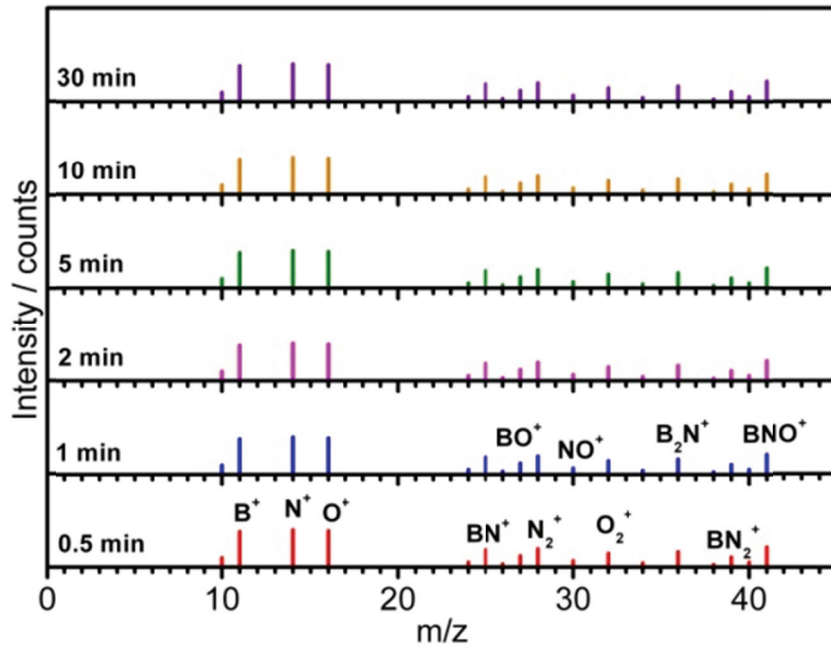

b

**Fig.S9 (a)** XRD patterns and **(b)** ToF-SIMS spectra of the products during the fabrication.



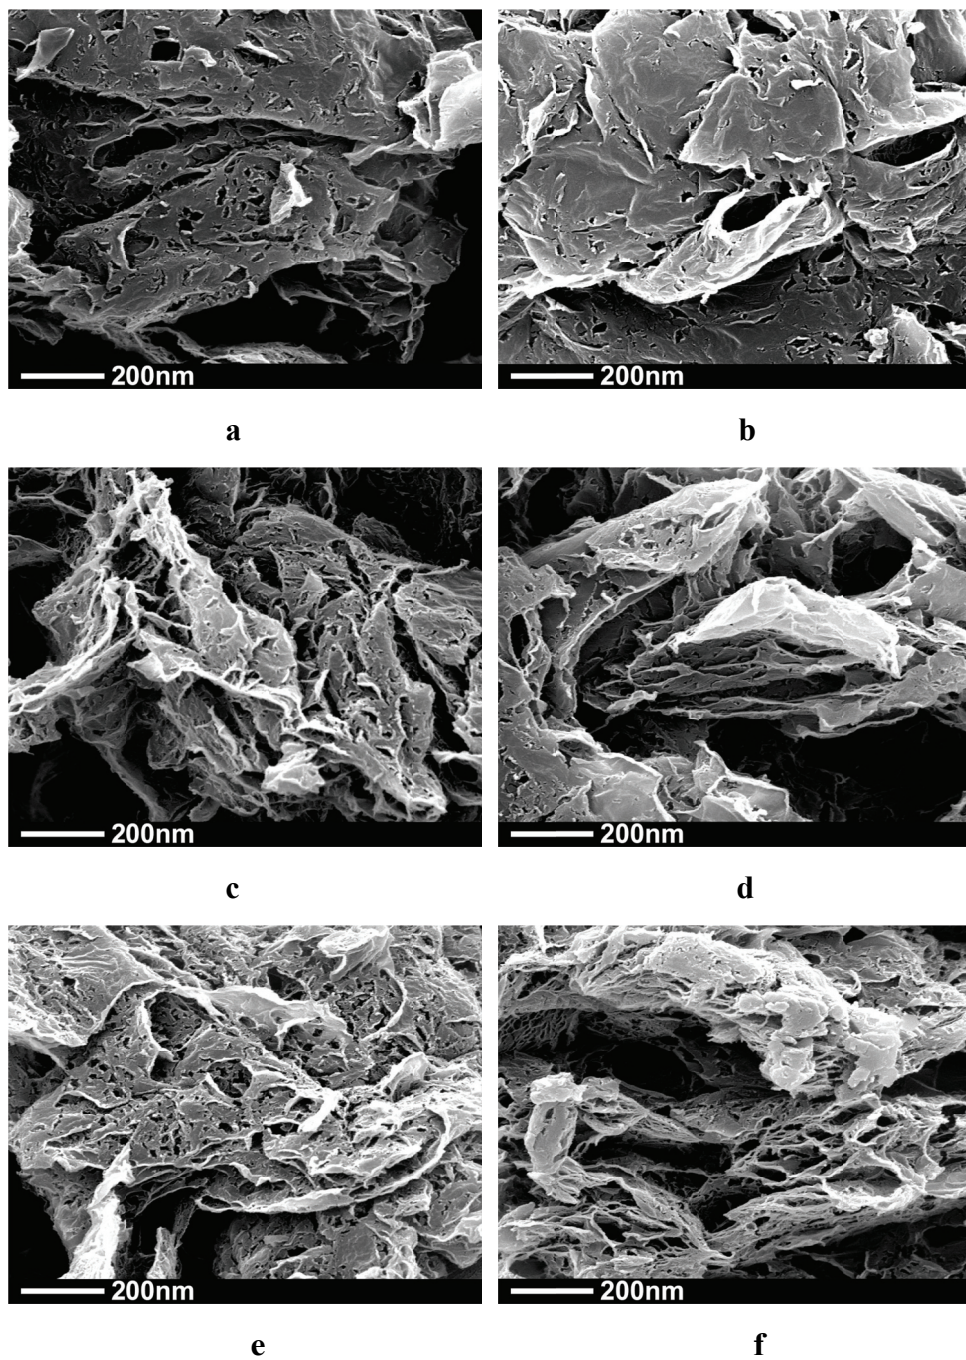

**Fig.S10** STEM images of the products during the fabrication: (a) 0.5 min; (b) 1 min; (c) 2 min;(d) 5 min;(e)10 min;(f) 30 min

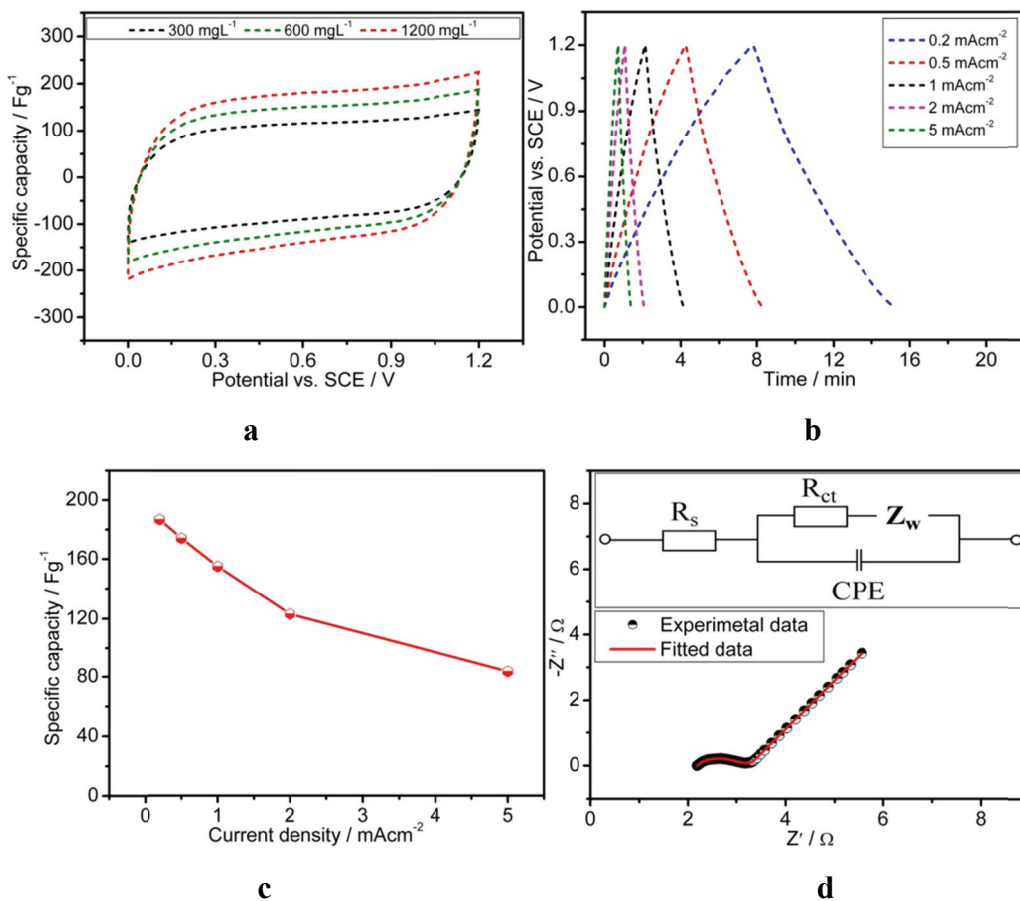

**Fig.S11** (a) CV curves with different concentrations at  $5 \text{ mVs}^{-1}$ ; (b) Charge/discharge curves in  $600 \text{ mgL}^{-1}$   $\text{CdCl}_2$  aqueous solution at  $0.2 \text{ mAcm}^{-2}$ ; (c) Specific capacity at various different current density; (d) Nyquist plots and equivalent circuit (inset) in  $600 \text{ mgL}^{-1}$   $\text{CdCl}_2$  aqueous solution of the as-prepared BNO nanosheets.

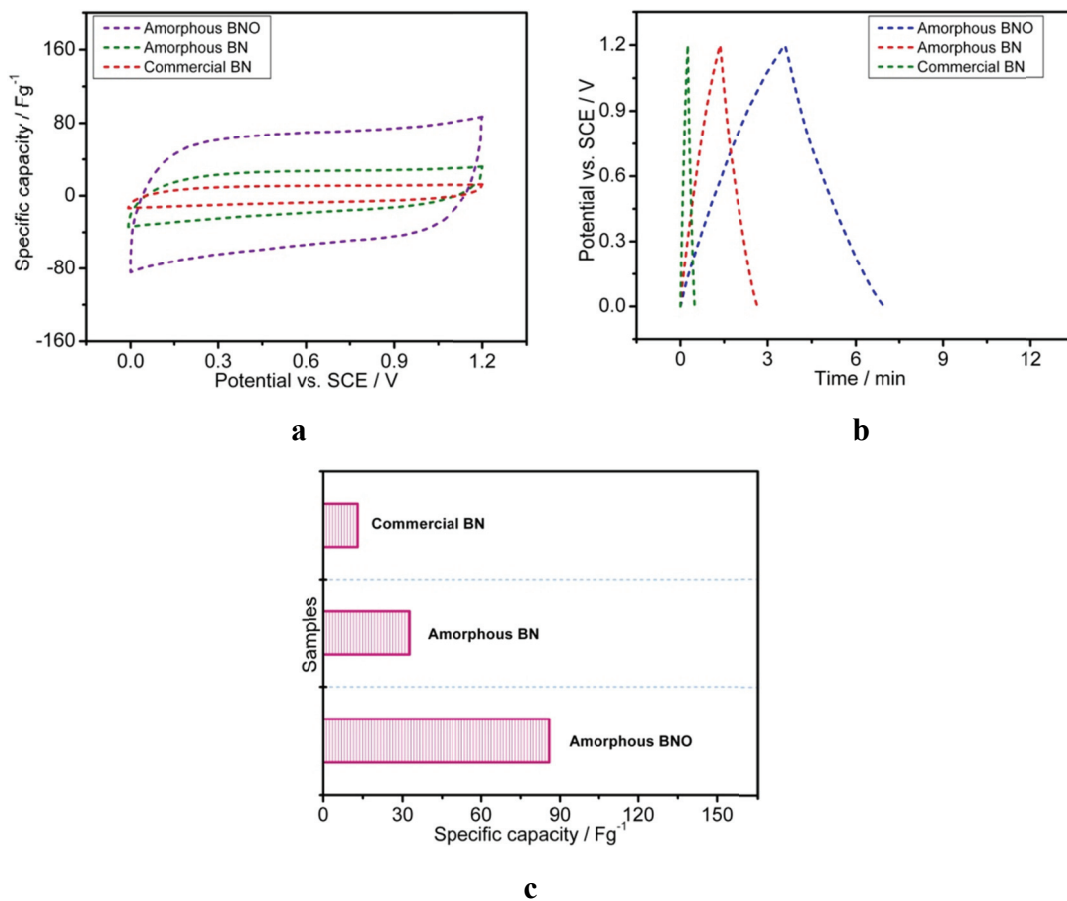

**Fig.S12** (a) CV curves at  $5 \text{ mVs}^{-1}$  in  $600\text{mgL}^{-1}$   $\text{CdCl}_2$  aqueous solution; (b) Charge-discharge profiles at  $0.2 \text{ mAcm}^{-2}$  in  $600\text{mgL}^{-1}$   $\text{CdCl}_2$  aqueous solution; (c) Specific capacity at  $0.2 \text{ mAcm}^{-2}$  in  $600\text{mgL}^{-1}$   $\text{CdCl}_2$  aqueous solution for amorphous BNO prepared in this work, commercial amorphous BN and BN.



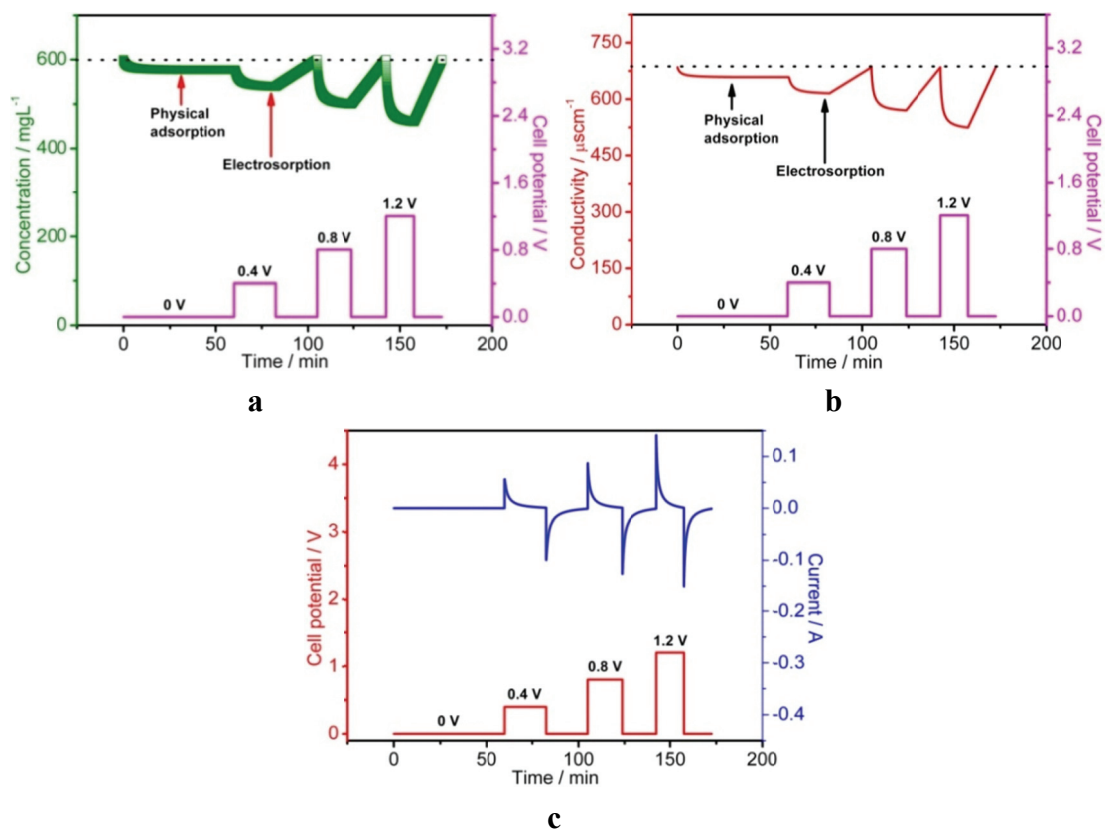

**Fig.S13** (a) Solution concentration changes; (b) solution conductivity changes and (c) current signal changes for the as-prepared BNO nanosheets over 600mgL<sup>-1</sup> CdCl<sub>2</sub> solution with a flowing rate of 50 mgL<sup>-1</sup> at various voltages during electroadsorption.

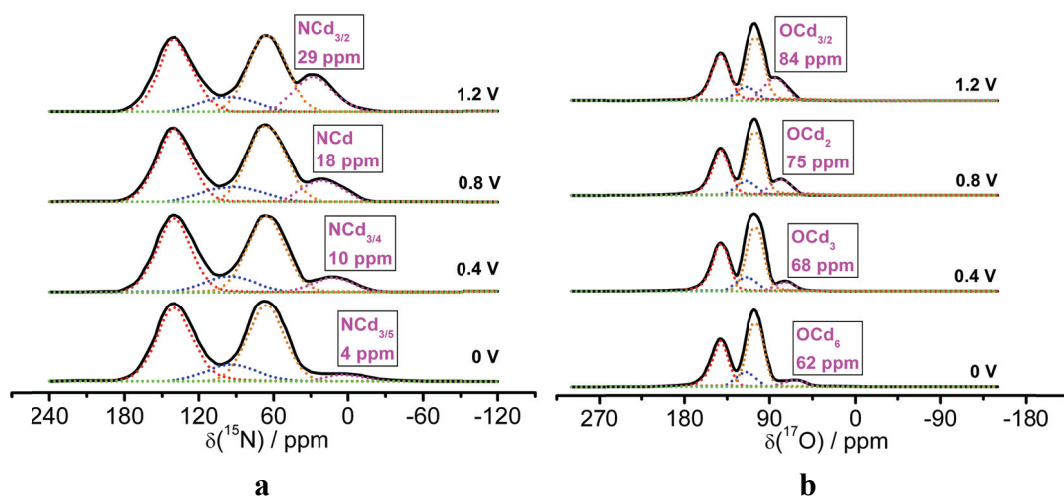

**Fig.S14** (a) <sup>15</sup>N and (b) <sup>17</sup>O MAS NMR of the charged BNO nanosheets at various voltage in CdCl<sub>2</sub> solution.

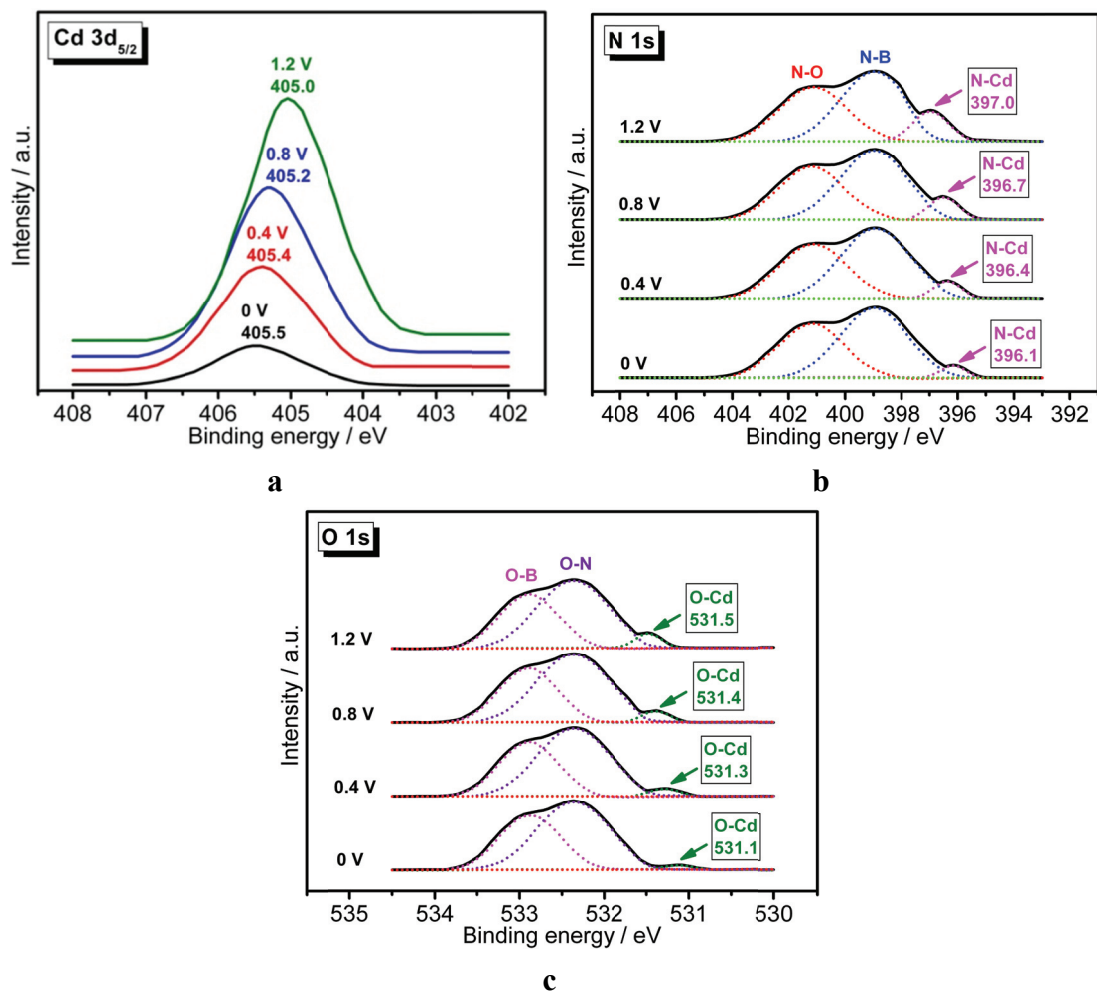

**Fig.S15** (a) Cd 3d<sub>5/2</sub> (b) N1s and (c) O1s XPS spectra of the charged BNO nanosheets at various applied voltage.

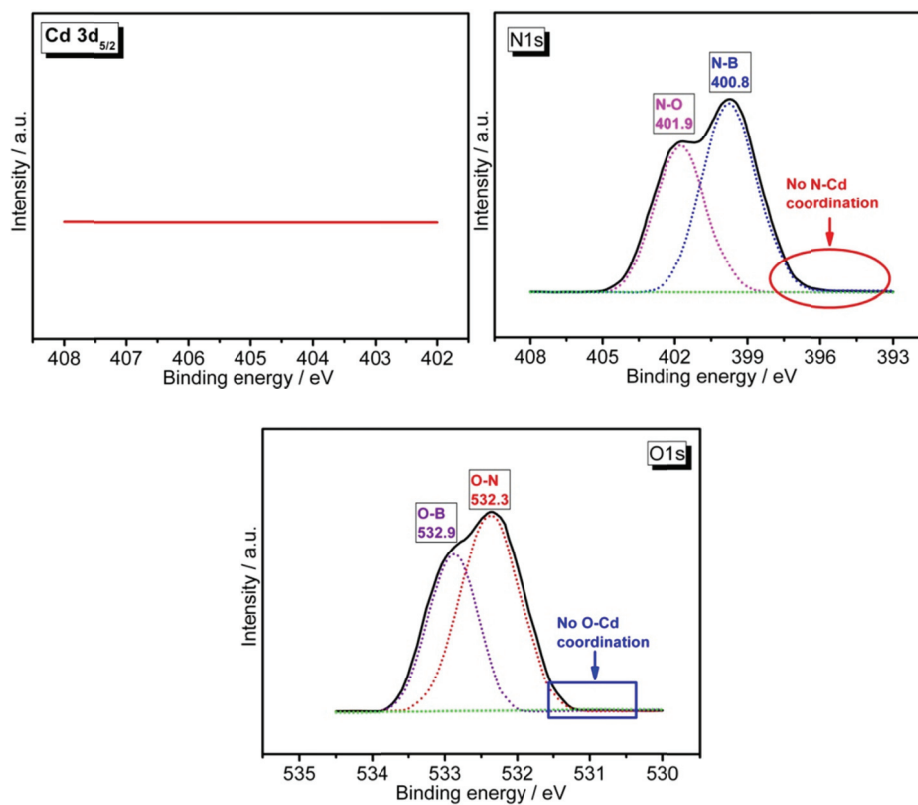

**Fig.S16** Cd 3d<sub>5/2</sub>, N1s and O1s XPS spectra of the charged BNO nanosheets when the electrode was short-circuited.

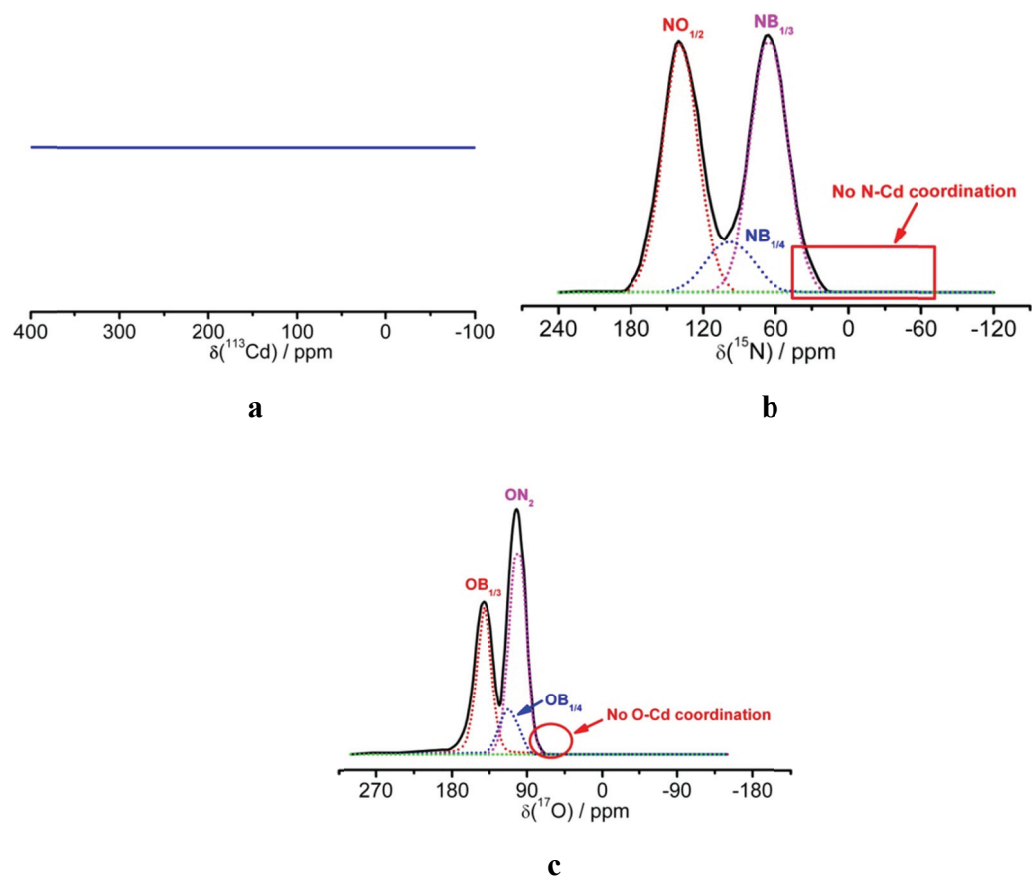

**Fig.S17** (a)  $^{113}\text{Cd}$ ; (b)  $^{15}\text{N}$  1s and (c)  $^{17}\text{O}$  MAS NMR spectra of the charged BNO nanosheets when the electrode was short-circuited.

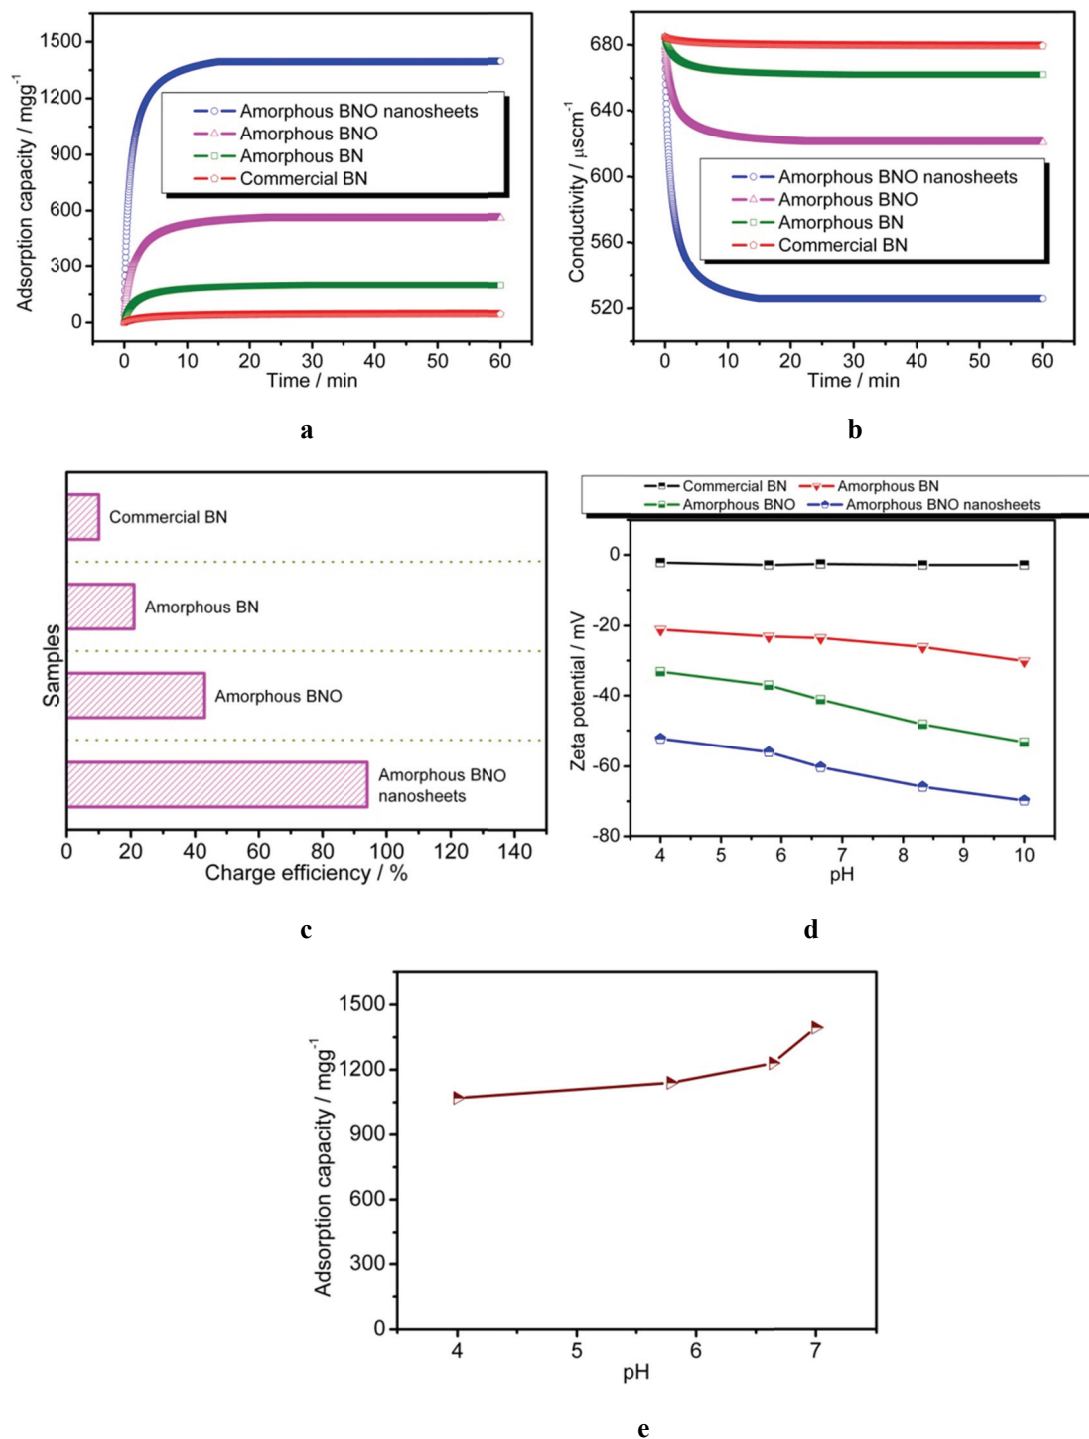

**Fig.S18** (a) Electroadsorption capacity vs. time profiles; (b) Solution conductivity vs. time profiles; (c) Charge efficiency and (d) Zeta potential vs. pH profiles of amorphous BNO nanosheets, amorphous BNO, commercial amorphous BN and BN, respectively; (e) The electroadsorption capacity of our amorphous BNO nanosheets towards  $\text{Cd}^{2+}$  vs. pH profile at 1.2 V by CDI with a flowing rate of  $50 \text{ mgL}^{-1}$ .

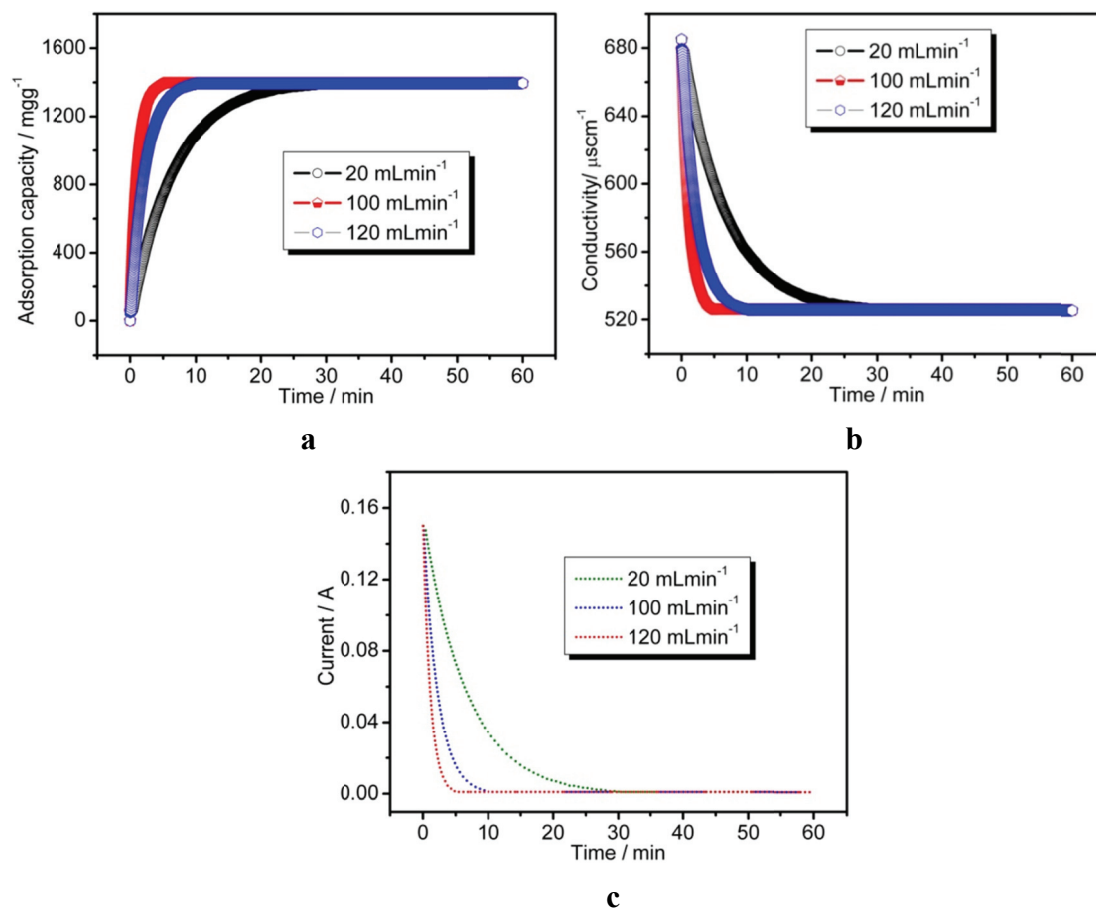

**Fig.S19** (a) Electro sorption capacity; (b) Solution conductivity and (c) I-t relationships of our amorphous BNO nanosheets towards  $\text{Cd}^{2+}$  at different flowing rates during electro sorption.

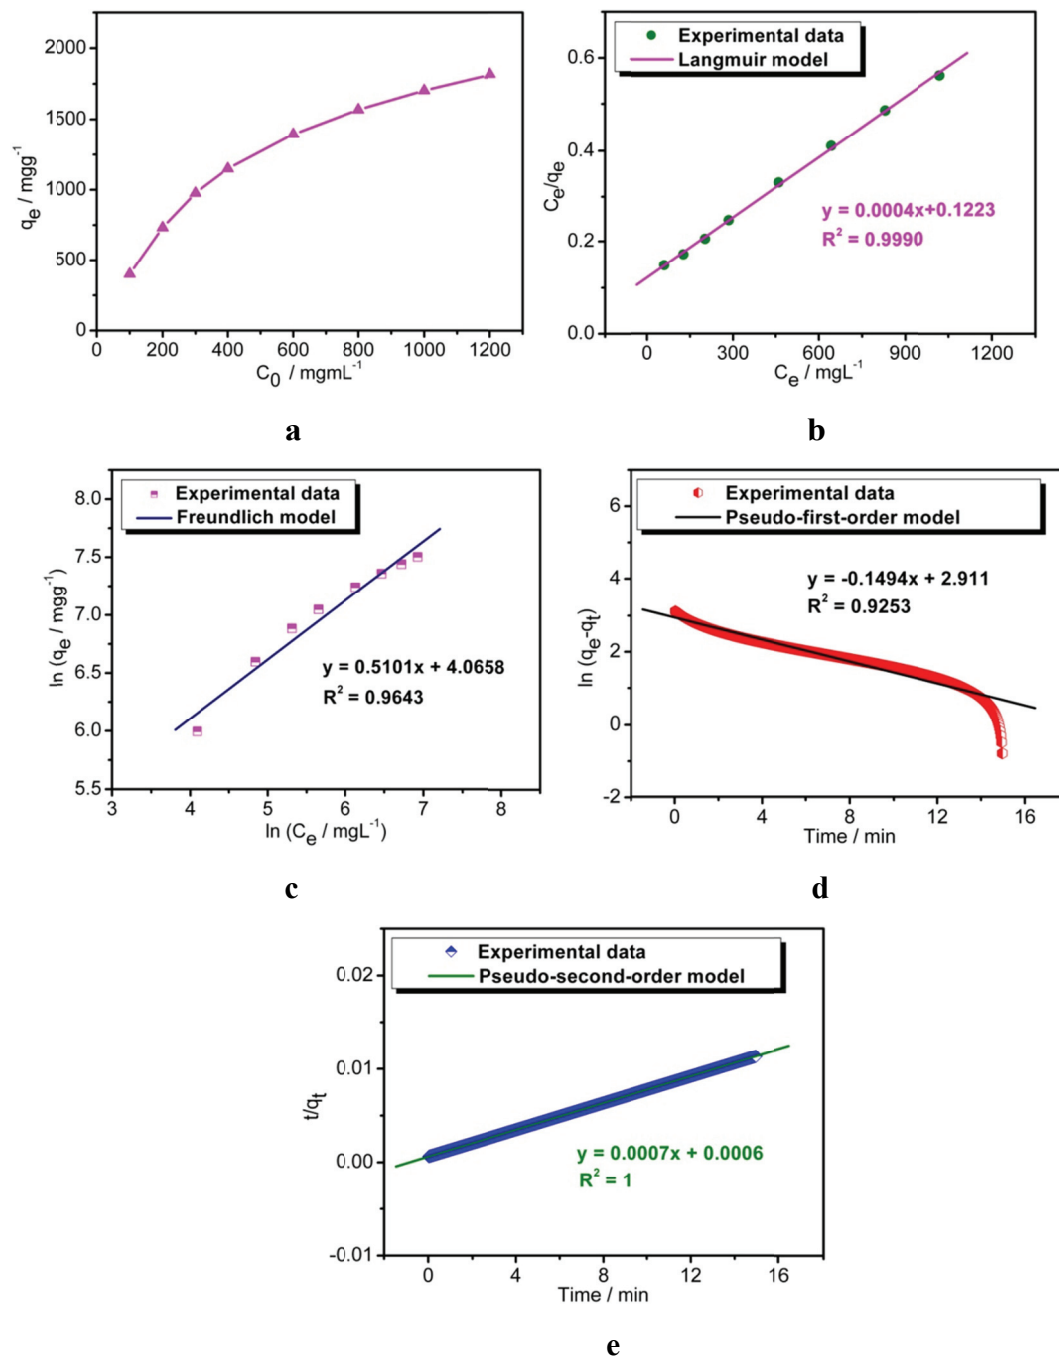

**Fig.S20** (a) Electro sorption isotherm;(b) Langmuir model simulation; (c) Freundlich model simulation; (d) pseudo-first-order kinetics simulation; (e) pseudo-second-order kinetics simulation for the as-prepared BNO nanosheets over  $600\text{mgL}^{-1}$   $\text{CdCl}_2$  aqueous solution at 1.2 V by CDI with a flowing rate of  $50\text{mgL}^{-1}$ .



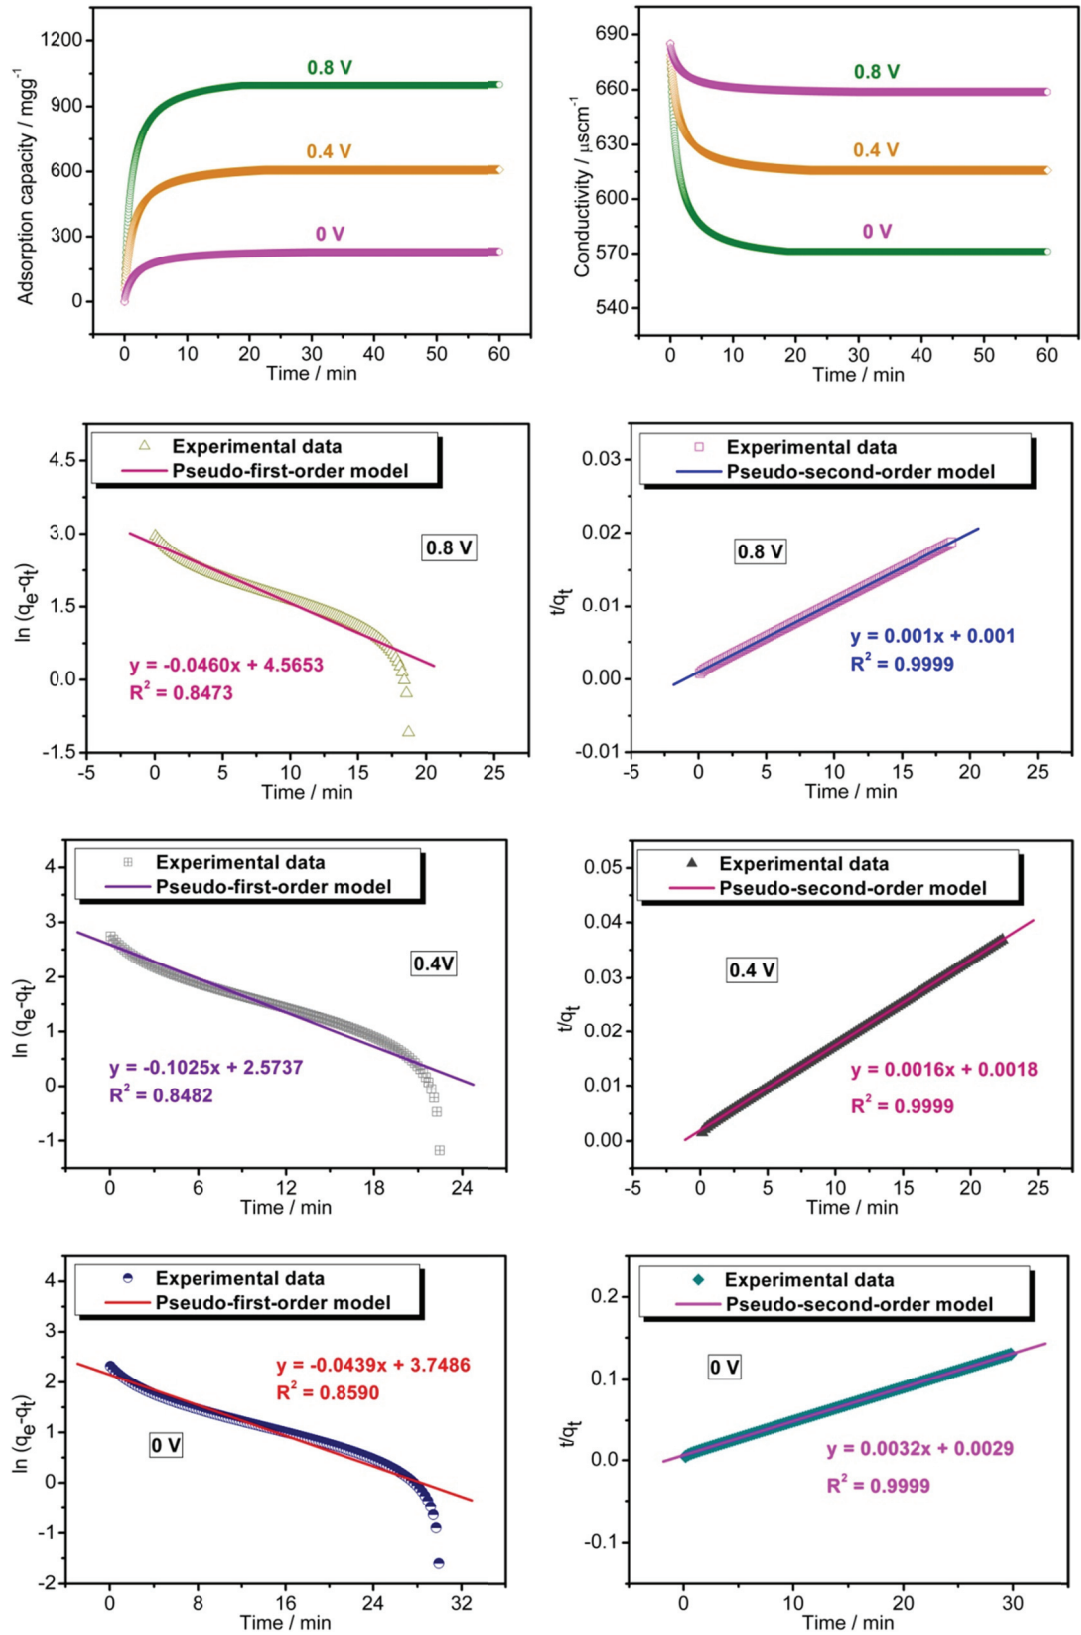

**Fig.S21** (a) Electroadsorption isotherm;(b) Solution conductivity; (c) Freundlich model simulation; (d) pseudo-first-order kinetics simulation; (e) pseudo-second-order

kinetics simulation for the as-prepared BNO nanosheets towards  $600 \text{ mgL}^{-1} \text{ CdCl}_2$  aqueous solution at different Bias potentials with a flowing rate of  $50 \text{ mgL}^{-1}$ .

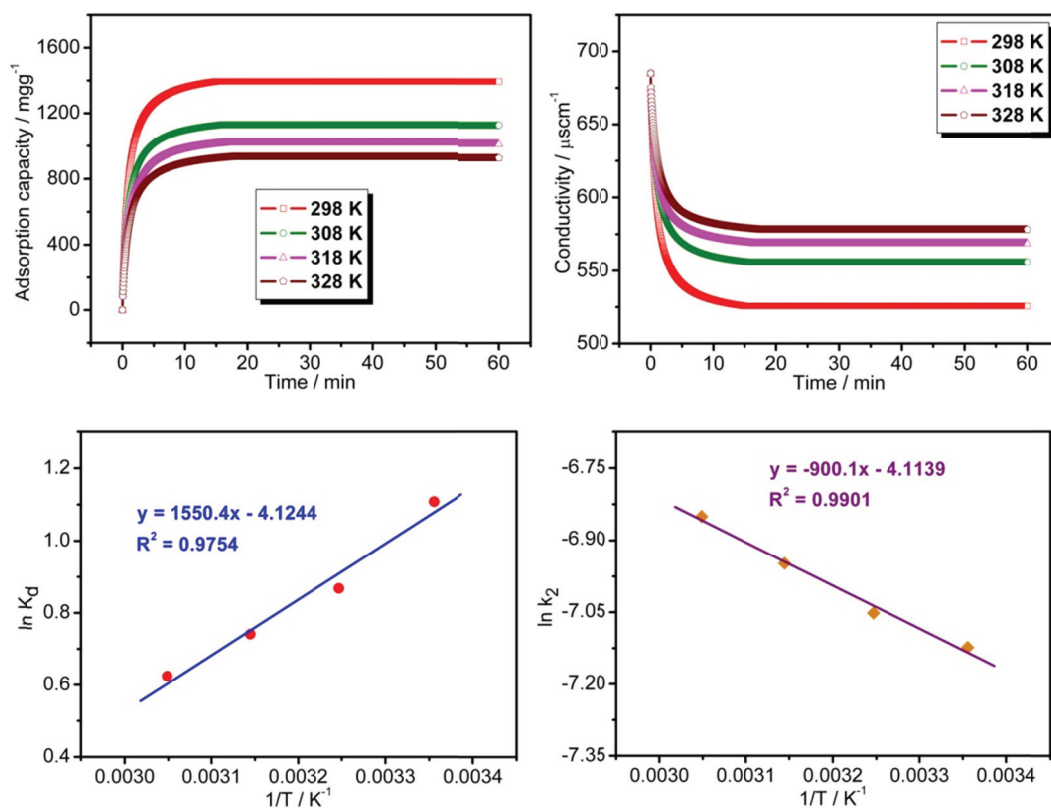

**Fig.S22** (a) electro-adsorption capacity at different temperatures; (b) solution conductivity changes; (c) Plots of  $\ln K_d$  vs  $T^{-1}$ ; (d) Plots of  $\ln k_2$  vs  $T^{-1}$  for the as-prepared BNO nanosheets towards  $600 \text{ mgL}^{-1} \text{ CdCl}_2$  aqueous solution at different Bias potentials with a flowing rate of  $50 \text{ mgL}^{-1}$ .

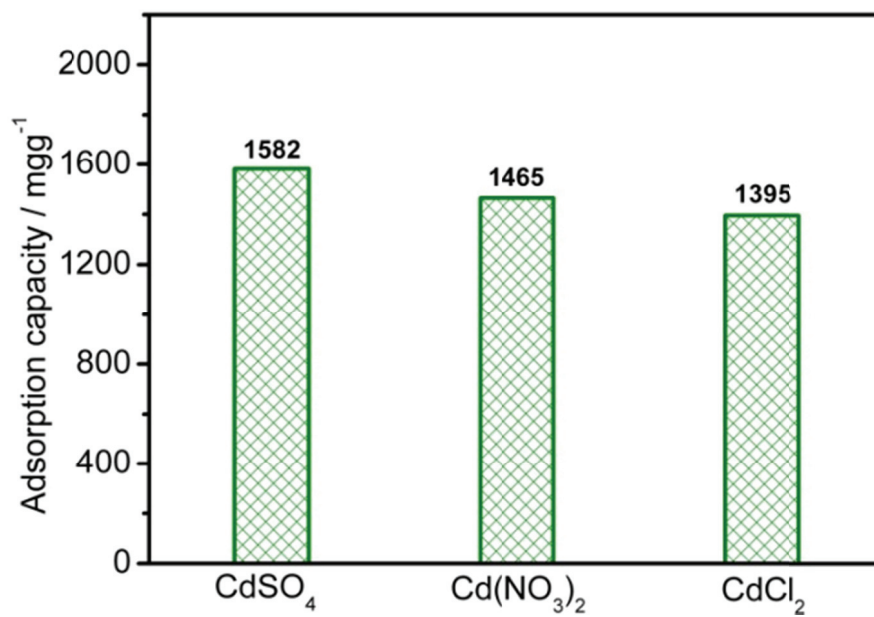

**Fig.S23** Effect of anions on the electrosorption capacity of BNO nanosheets (600mgL<sup>-1</sup>Cd<sup>2+</sup>) at 1.2 V by CDI with a flowing rate of 50 mgL<sup>-1</sup>.

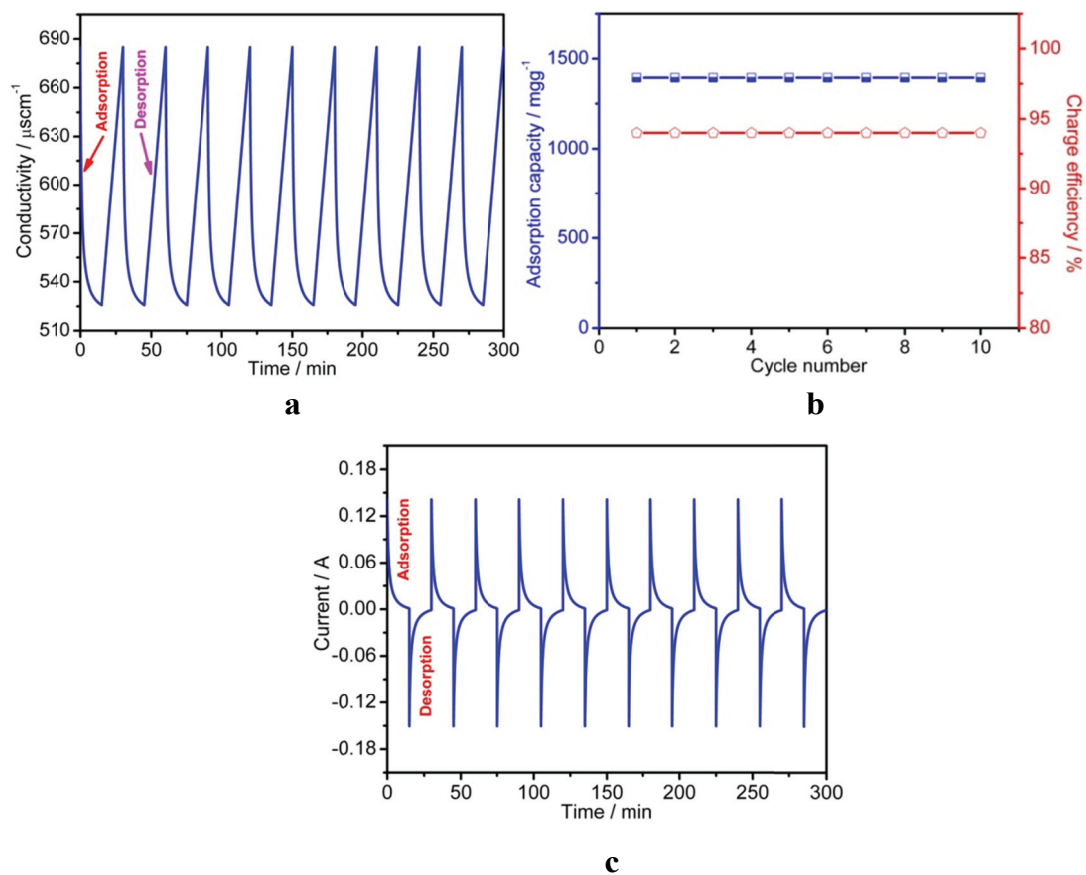

**Fig.S24** (a) Solution conductivity changes; (b) electrosorption capacity and charge efficiencies; (c) the I-t curves of adsorption (charge at 1.2 V) and desorption (discharge at 0 V) for BNO nanosheets towards  $600\text{mgL}^{-1}$   $\text{CdCl}_2$  aqueous solution at 1.2 V by CDI with a flowing rate of  $50\text{mgL}^{-1}$  over 10 cycles.

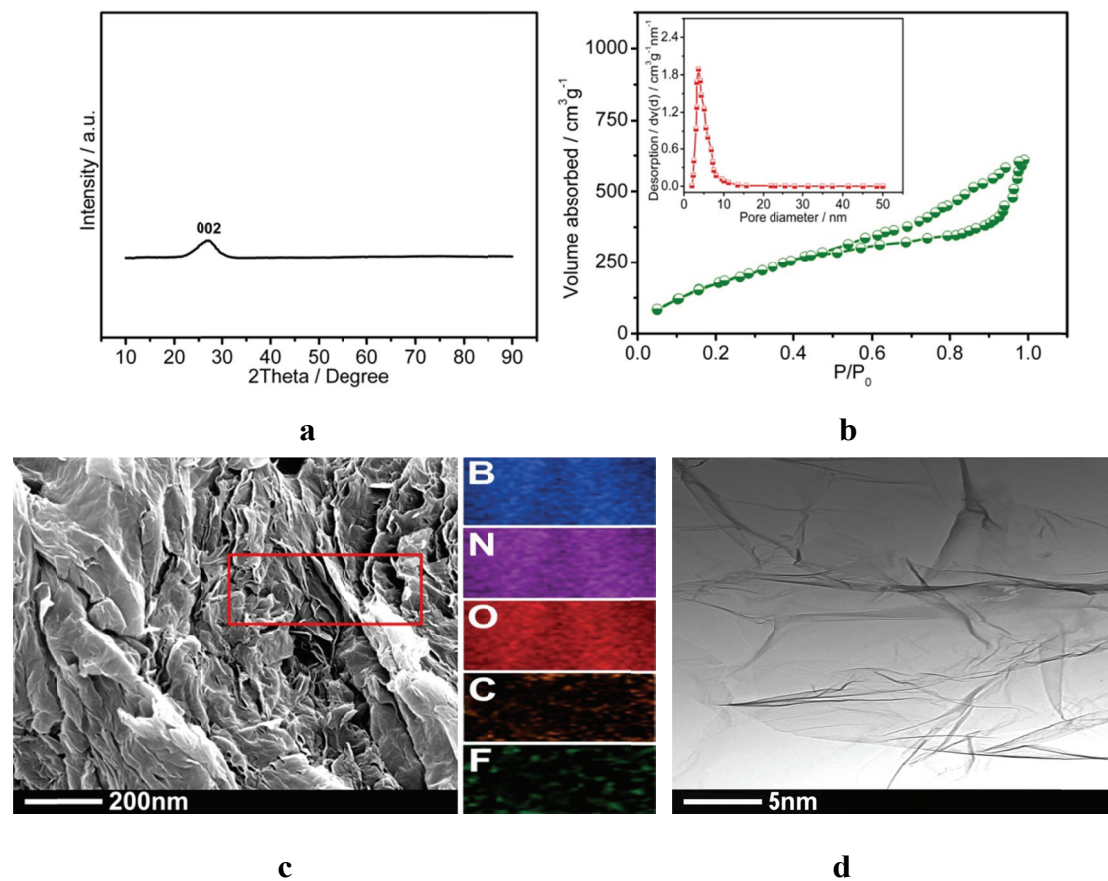

**Fig.S25** (a) XRD profile; (b) Nitrogen sorption isotherm (the inset is the pore size distribution); (c) STEM image and the elemental mapping of its red frame (C and F elements originated from PTFE and carbon black) and (f) enlarged STEM image of the as-prepared BNO nanosheets after 10 cycles.

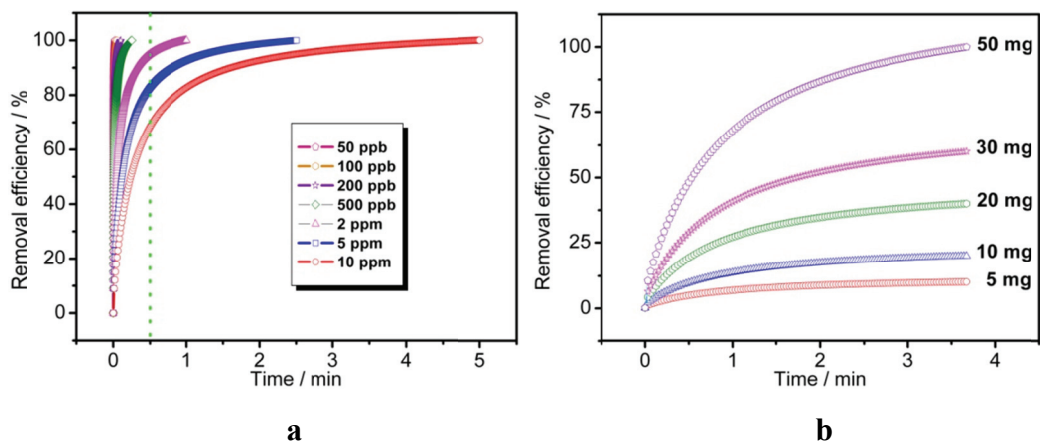

**Fig.S26** CDI Removal efficiency of (a)10 mg BNO nanosheets over  $\text{Cd}^{2+}$  50 ppb to 10 ppm; (b) BNO nanosheets with different masses over  $600 \text{ mgL}^{-1} \text{ Cd}^{2+}$  under 1.2 V at a flow rate of  $50 \text{ mgL}^{-1}$ .

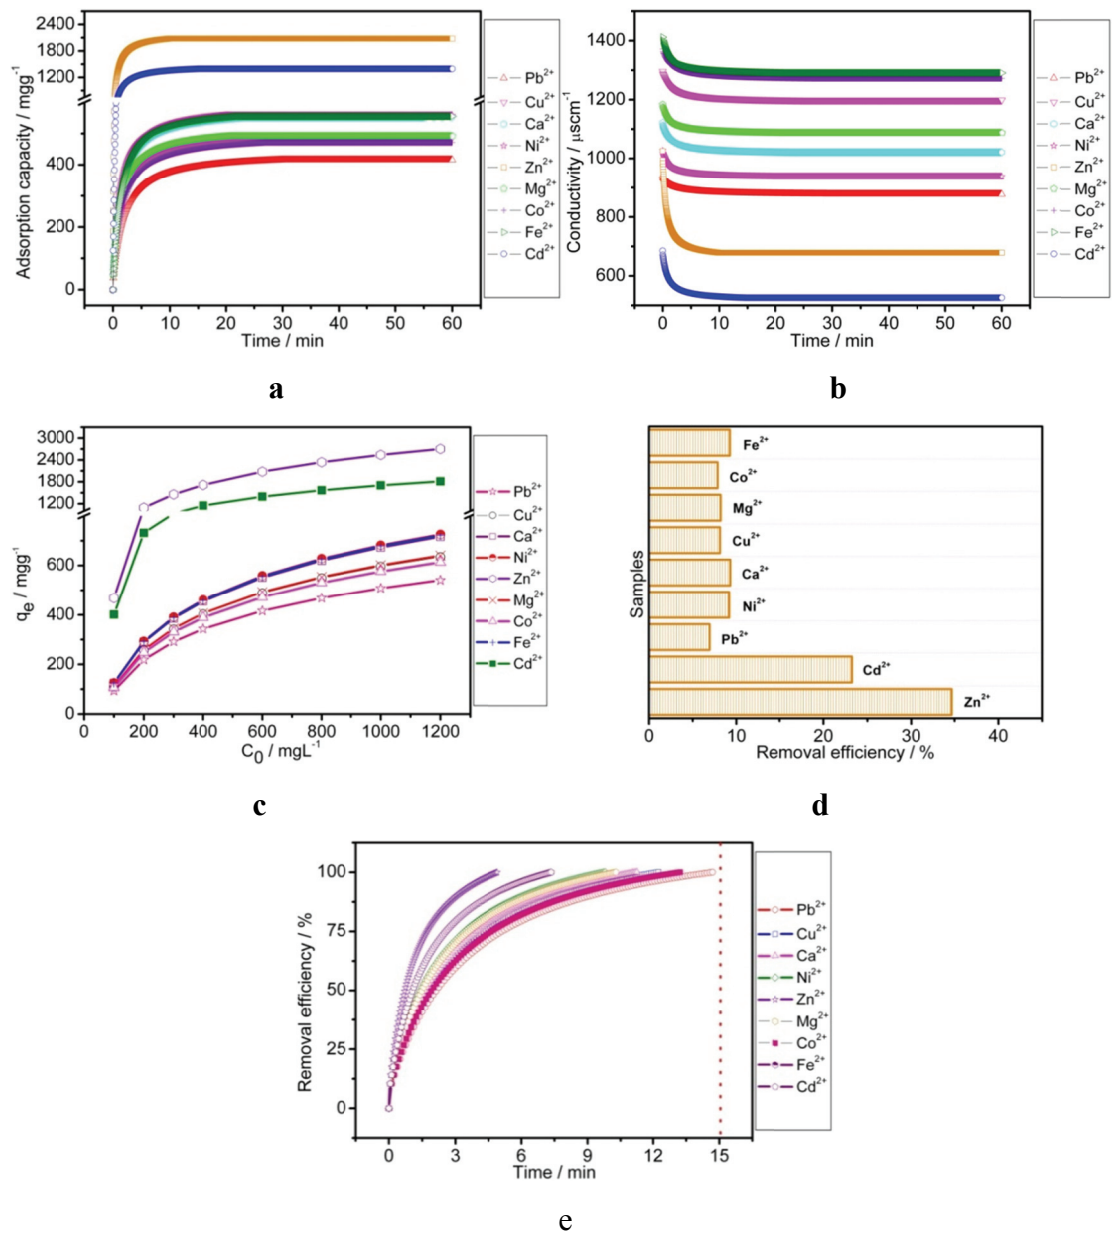

**Fig.27** (a) In-situ electroadsorption curves; (b) solution conductivity changes; (c) Electroadsorption isotherms;(d) removal efficiency for individual metal ions in aqueous solution ( $600\text{mgL}^{-1}$ ) over 10 mg BNO nanosheets; (e) Removal efficiency for competitive metal ions in 100 mL aqueous solution ( $600\text{mgL}^{-1}$ ) on 200 mg BNO nanosheets at 1.2 V by CDI with a flowing rate of  $50\text{mgL}^{-1}$ .

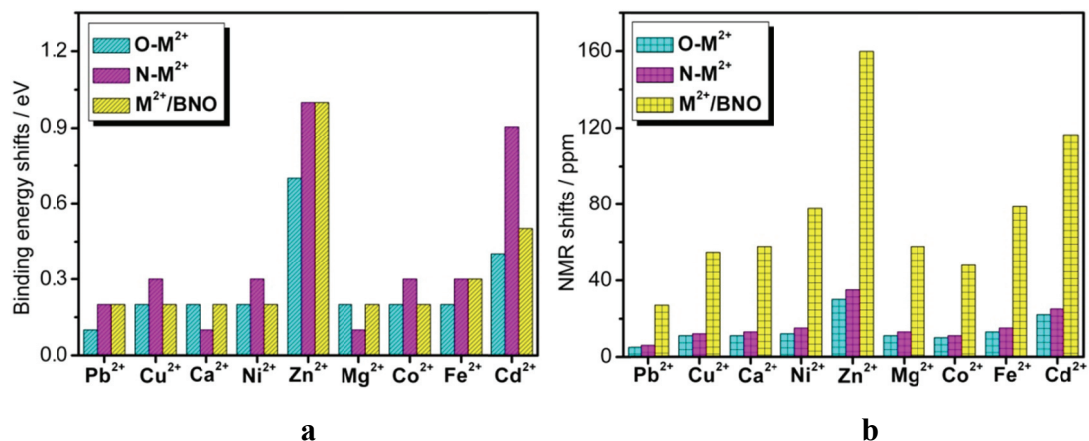

**Fig.28** (a) Binding energy shifts of N, O and M<sup>2+</sup> and (b) <sup>15</sup>N, <sup>17</sup>O and M<sup>2+</sup> MAS NMR shifts of our BNO nanosheets after being charged at 1.2V in various metal ions solution (600mgL<sup>-1</sup>) at a flow rate of 50 mgL<sup>-1</sup>. All the chemical shifts was determined from the shifts of core peaks in the NMR spectra. The chemical shifts of Fe<sup>2+</sup> and Ni<sup>2+</sup> was determined from their static NMR spectra.



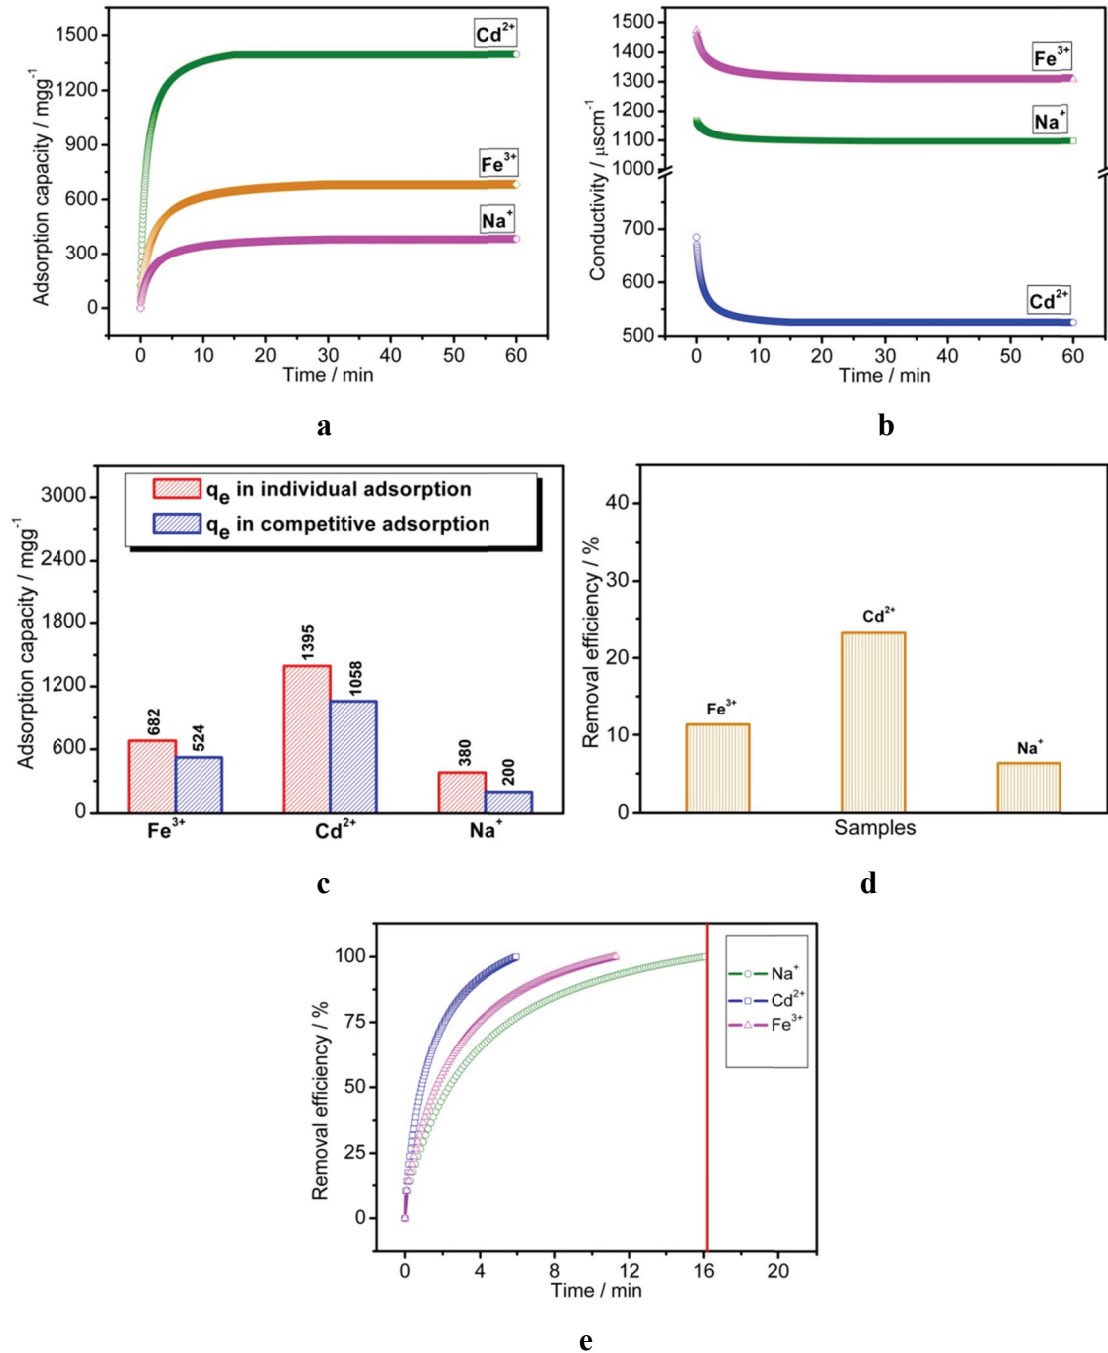

**Fig.29** (a) In-situ electroadsorption curves; (b) solution conductivity changes; (c) Electroadsorption capacity in individual and competitive adsorption; (d) removal efficiency for individual metal ions in aqueous solution ( $600\text{mgL}^{-1}$ ) over 10 mg BNO nanosheets; (e) Removal efficiency for competitive metal ions in 100 mL aqueous solution ( $600\text{mgL}^{-1}$ ) on 200 mg BNO nanosheets at 1.2 V by CDI with a flowing rate of  $50\text{mgL}^{-1}$ .

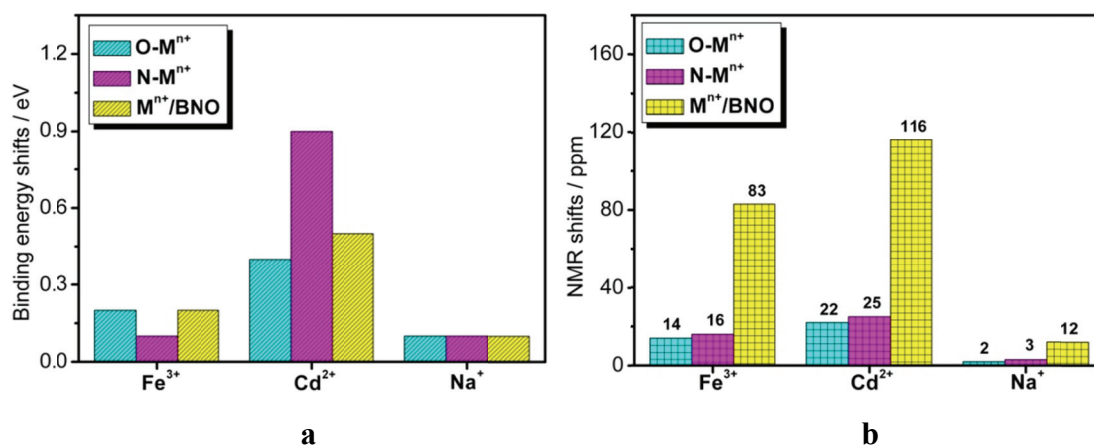

**Fig.30** (a) Binding energy shifts of N, O and M<sup>n+</sup> and (b) <sup>15</sup>N, <sup>17</sup>O and M<sup>n+</sup> MAS NMR shifts of our BNO nanosheets after being charged at 1.2V in various metal ions solution (600mgL<sup>-1</sup>) at a flow rate of 50 mgL<sup>-1</sup>. All the chemical shifts was determined from the shifts of core peaks in the NMR spectra. The chemical shifts of Fe<sup>3+</sup> was determined from its static NMR spectra.

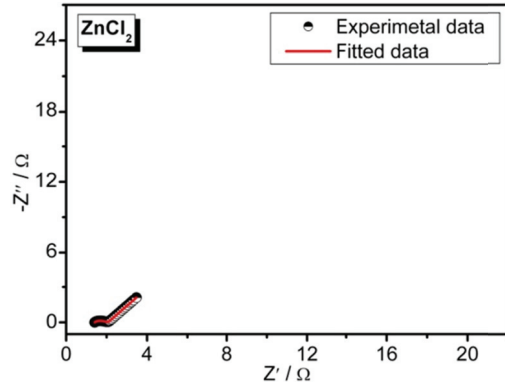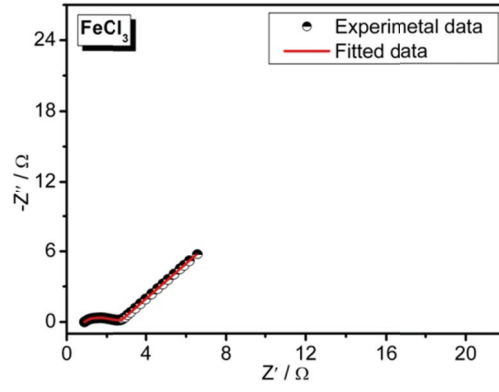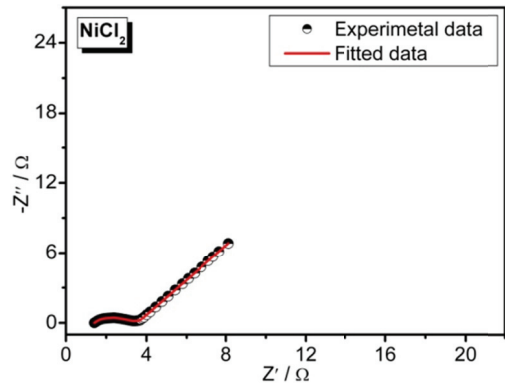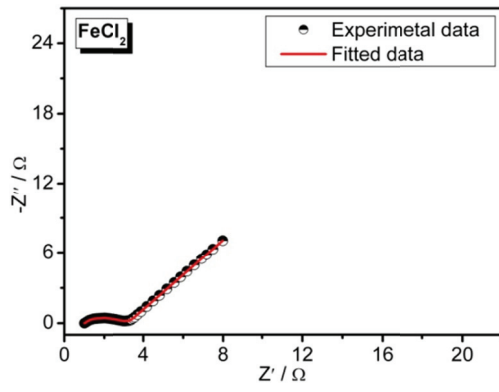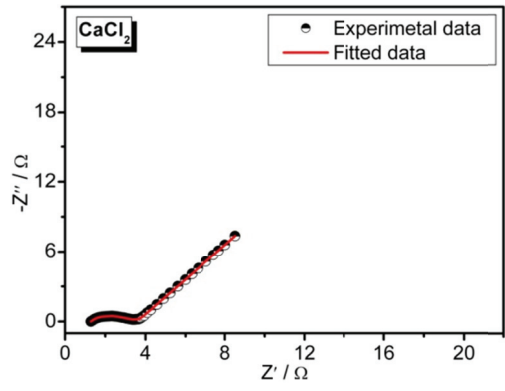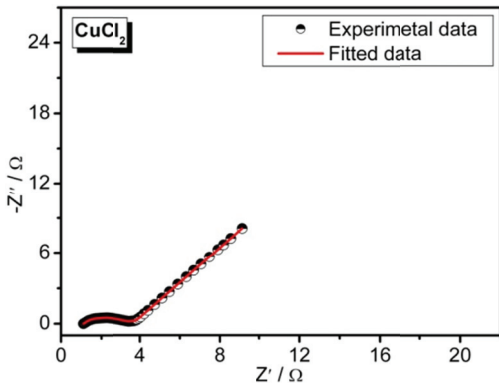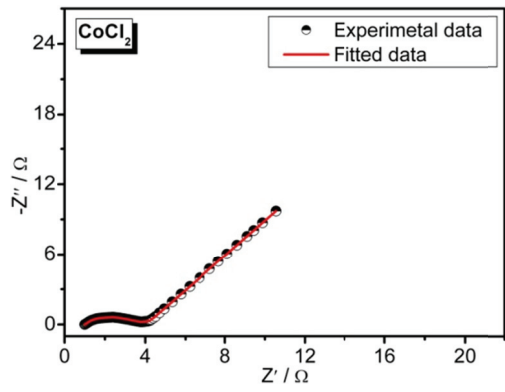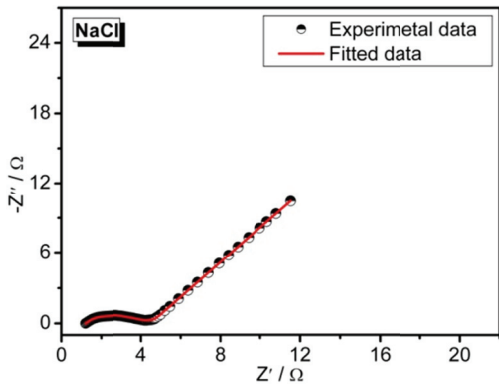

(Continued)

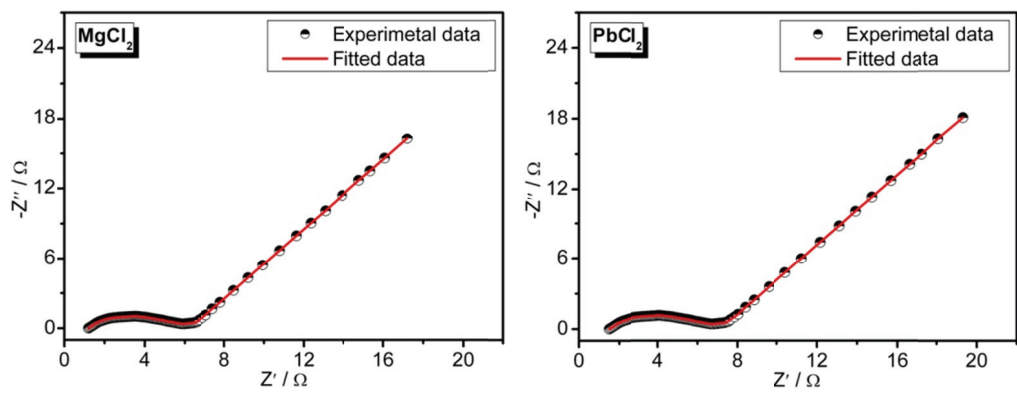

**Fig.S31** Nyquist plots of the as-prepared BNO nanosheets in different ion solutions ( $600\text{mgL}^{-1}$ ) at room temperature.

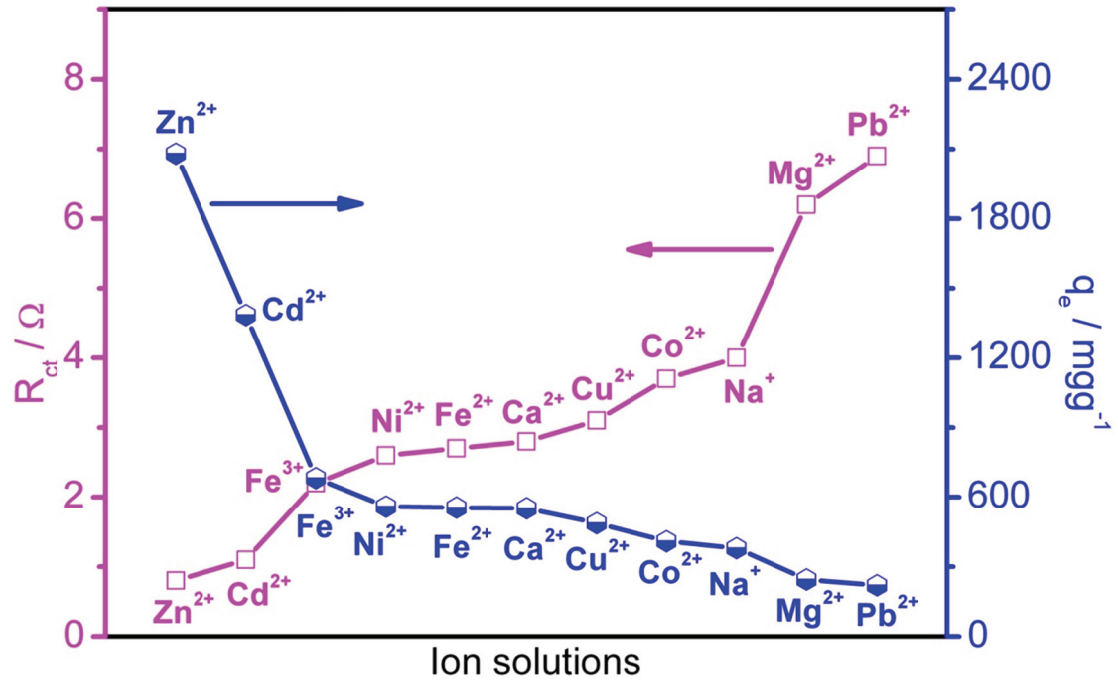

**Fig.S32** The relationships between  $R_{ct}$  and  $q_e$  of BNO nanosheets being charged at 1.2V in various metal ions solution ( $600\text{mgL}^{-1}$ ) with a flow rate of  $50\text{mgL}^{-1}$ .
